# Supplementary material for: A chemical probe based on the PreQ1 metabolite enables transcriptome-wide mapping of binding sites
Source: PubMed Central journal article supplement (PMC8494917; doi:10.1038/s41467-021-25973-x), 2021-10-06
Supplement: 41467_2021_25973_MOESM1_ESM.pdf [file 41467_2021_25973_MOESM1_ESM.pdf]

# A Chemical Probe Based on the PreQ<sub>1</sub> Metabolite Enables Transcriptome-wide Mapping of Binding Sites

Sumirtha Balaratnam<sup>1\*</sup>, Curran Rhodes<sup>1\*</sup>, Desta Doro Bume<sup>1</sup>, Colleen Connelly<sup>1</sup>, Christopher C. Lai<sup>1</sup>, James A. Kelley<sup>1</sup>, Kamyar Yazdani<sup>1</sup>, Philip J. Homan<sup>2,3</sup>, Danny Incarnato<sup>4</sup>, Tomoyuki Numata<sup>5,6</sup> and John S. Schneekloth Jr<sup>\*1,†</sup>

## Supporting Information

### Section 1: Tables and Figures

**Table S1:** Summary of data collection and refinement statistics

Table S1. Summary of data collection and refinement statistics.

|                                                                               | ab13_14-11                 | Wild type-11               |
|-------------------------------------------------------------------------------|----------------------------|----------------------------|
| <b>Data collection</b>                                                        |                            |                            |
| Space group                                                                   | <i>P</i> 6 <sub>1</sub> 22 | <i>P</i> 6 <sub>3</sub> 22 |
| Cell dimensions                                                               |                            |                            |
| <i>a</i> , <i>b</i> , <i>c</i> (Å)                                            | 52.7, 52.7, 177.0          | 113.2, 113.2, 59.5         |
| Wavelength (Å)                                                                | 1.0                        | 1.0                        |
| Resolution (Å)                                                                | 45.6-1.57 (1.62-1.57)      | 41.0-2.80 (2.98-2.80)      |
| <i>R</i> <sub>merge</sub> <sup>a</sup>                                        | 0.123 (2.22)               | 0.177 (1.92)               |
| <i>R</i> <sub>p.i.m.</sub> <sup>b</sup>                                       | 0.028 (0.506)              | 0.061 (0.655)              |
| CC <sub>1/2</sub> <sup>c</sup>                                                | 0.999 (0.641)              | 0.997 (0.663)              |
| $\langle I \rangle / \langle \sigma I \rangle$                                | 16.2 (1.3)                 | 9.4 (1.3)                  |
| Completeness (%)                                                              | 100 (100)                  | 98.1 (96.0)                |
| Redundancy                                                                    | 20.5 (20.1)                | 8.2 (8.5)                  |
| <b>Refinement</b>                                                             |                            |                            |
| Resolution (Å)                                                                | 45.6-1.57                  | 41.0-2.80                  |
| No. reflections                                                               | 21,395                     | 5,768                      |
| <i>R</i> <sub>work</sub> <sup>d</sup> / <i>R</i> <sub>free</sub> <sup>e</sup> | 0.190/0.208                | 0.193/0.235                |
| No. atoms                                                                     |                            |                            |
| RNA                                                                           | 694                        | 686                        |
| Ligand                                                                        | 22                         | 22                         |
| Ions                                                                          | 13                         | 5                          |
| Water                                                                         | 86                         | 2                          |
| <i>B</i> -factors (Å <sup>2</sup> )                                           |                            |                            |
| RNA                                                                           | 40.2                       | 87.1                       |

|                   |       |       |
|-------------------|-------|-------|
| Ligand            | 37.5  | 97.7  |
| Ions              | 110.3 | 147.0 |
| Water             | 46.3  | 61.1  |
| R.m.s. deviations |       |       |
| Bond lengths (Å)  | 0.004 | 0.006 |
| Bond angles (°)   | 0.900 | 1.175 |
| PDB ID            | 7E9E  | 7E9I  |

The values in parentheses are for the outermost shell.

<sup>a</sup>  $R_{\text{merge}} = \frac{\sum_{hkl} \sum_i |I_i(hkl) - \langle I(hkl) \rangle|}{\sum_{hkl} \sum_i I_i(hkl)}$ , where  $I_i(hkl)$  is the observed intensity and  $\langle I(hkl) \rangle$  is the average intensity over symmetry-equivalent measurements.

<sup>b</sup> Definition of  $R_{\text{p.i.m.}}$  can be found in Ref. 1.

<sup>c</sup> Pearson correlation coefficient between intensities of random half-dataset (Ref. 2).

<sup>d</sup>  $R_{\text{work}} = \frac{\sum |F_o - F_c|}{\sum F_o}$  for reflections of working set.

<sup>e</sup>  $R_{\text{free}} = \frac{\sum |F_o - F_c|}{\sum F_o}$  for reflections of test set (5.0% of total reflections).

**Table S2:** Sequences of primers used in qPCR experiments.

| Gene name                        |                 | Sequence (5'-3')              |
|----------------------------------|-----------------|-------------------------------|
| RF00024<br>(ENSG00000277925.1)   | Forward Primers | AAC CCT AAC TGA GAA GGG CG    |
|                                  | Reverse Primers | AGA ATG AAC GGT GGA AGG CG    |
| HIST2H2BF<br>(ENSG00000203814.6) | Forward Primers | TTC GCG CAA AAA TGC CG        |
|                                  | Reverse Primers | CTT CAG CAC CTT GTA CAC GTA A |
| HIST1H3F<br>(ENSG00000277775.1)  | Forward Primers | CAG CTC GTA AGT CCA CTG GC\   |
|                                  | Reverse Primers | CGA TTT CTG ATA GCG GCG GA    |
| GAPDH<br>(ENSG00000111640.14)    | Forward Primers | AGG TCG GTG TGA ACG GAT TTG   |
|                                  | Reverse Primers | GGG GTC GTT GAT GGC AAC A     |

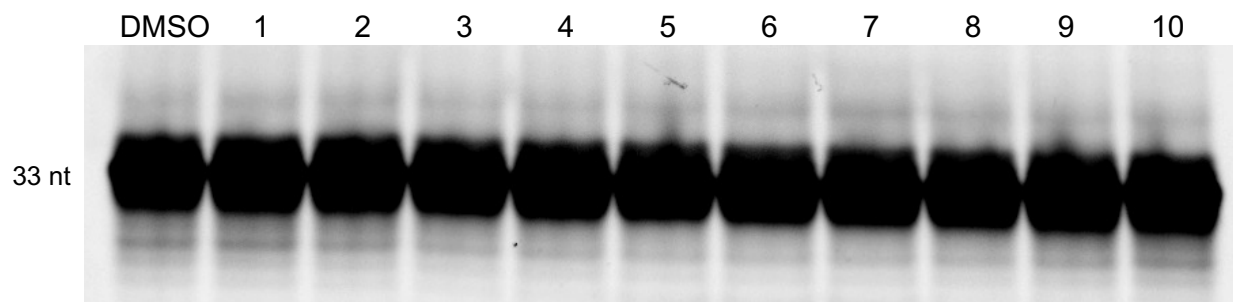

**Figure S1:** PAGE analysis of electrophilic probes **1-10** reactivity towards the *Tt*-preQ<sub>1</sub>-RS. No evidence of higher molecular weight covalent adducts was observed in this case for any of the 10 compounds tested. For these experiments, the molar ratio between the *Tt*-preQ<sub>1</sub>-RS aptamer and electrophilic probes was 1:50. The experiment was repeated three time independently. Full image was provided in the Source Data file.

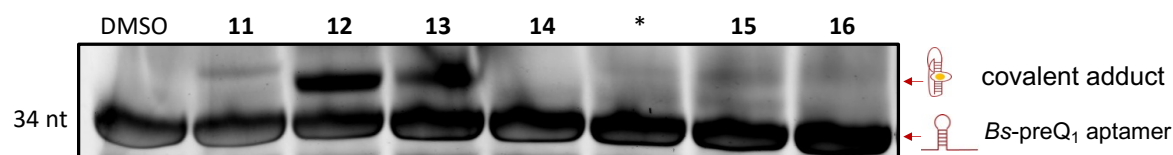

**Figure S2:** PAGE analysis of photoaffinity probes reactivity towards to *Bs*-preQ<sub>1</sub>-RS aptamer. The unstabilized probes (**11**, **12**, and **13**) and stabilized probes (**15** and **16**) expect **14** showed formation the higher molecular weight covalent adduct. The molar ratio between the aptamer and probe was 1:50 under this experimental condition. The experiment was repeated three time independently and source data are provided as a Source Data file.

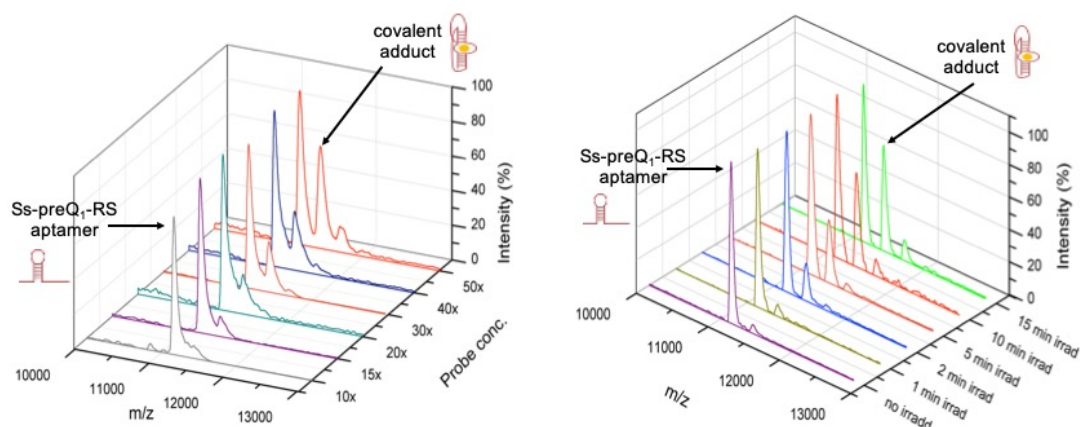

**Figure S3:** Orbitrap-LC/MS based characterization of dose (left) and time (right) dependent crosslinking efficiency of compound **11** towards *Ss-preQ<sub>1</sub>-RS* (5  $\mu\text{M}$ ). In the dose dependent experiments, the “x” represents the molar ratio between probe and *Ss-preQ<sub>1</sub>-RS* aptamer. The molar ratio between the aptamer and probe **11** was 1:50 in the time dependent crosslinking experiments. At molar ratios of 50x and above and/or with extended UV irradiation time, a second peak corresponding to a higher mass species consistent with a secondary covalent crosslinking event can be observed.

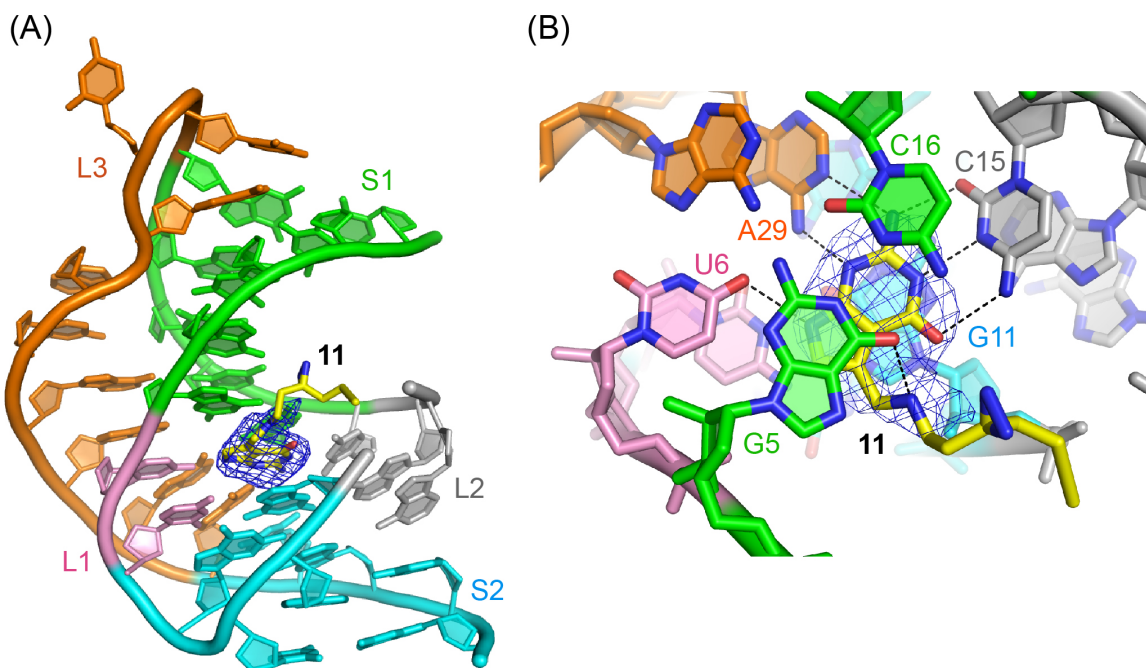

**Figure S4:** Crystal structures of the wild-type *Tt*-preQ<sub>1</sub>-RS riboswitch aptamer complexed with **11**. **(A)** Overall structure of the complex. **(B)** Close up view of the binding site of **11**. S1, S2, L1, L2, and L3 are colored green, cyan, pink, gray, and orange, respectively. The  $mF_o - DF_c$  electron density map for **11** is colored blue and contoured at 3.0  $\sigma$ . The nucleotides interact with the compound are labeled, and hydrogen bonds are indicated as dotted lines.

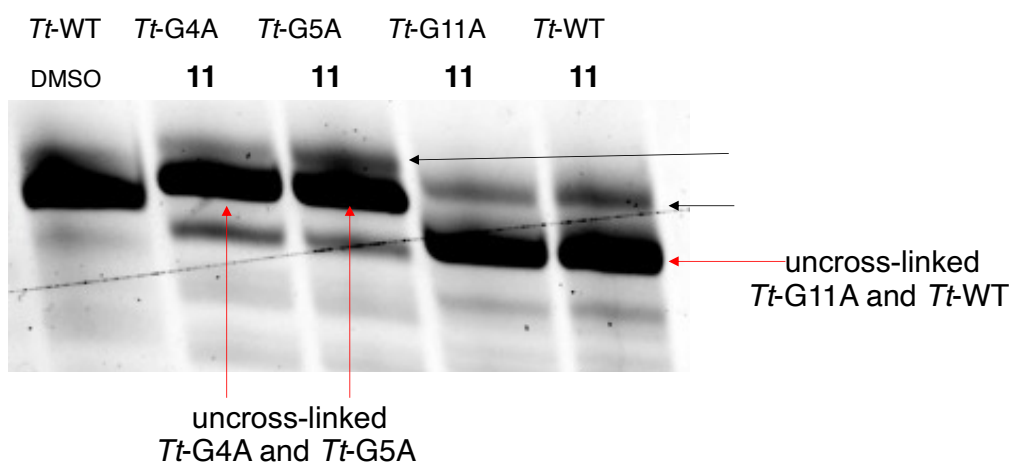

**Figure S5:** Representative PAGE gel image showing photocrosslinking of **11** to the WT and 3 different mutants of *Tt*-preQ<sub>1</sub>-RS aptamers. The molar ratio between the aptamer and probe was 1:50 under this experimental condition. The experiment was repeated three time independently. Source data are provided as a Source Data file.

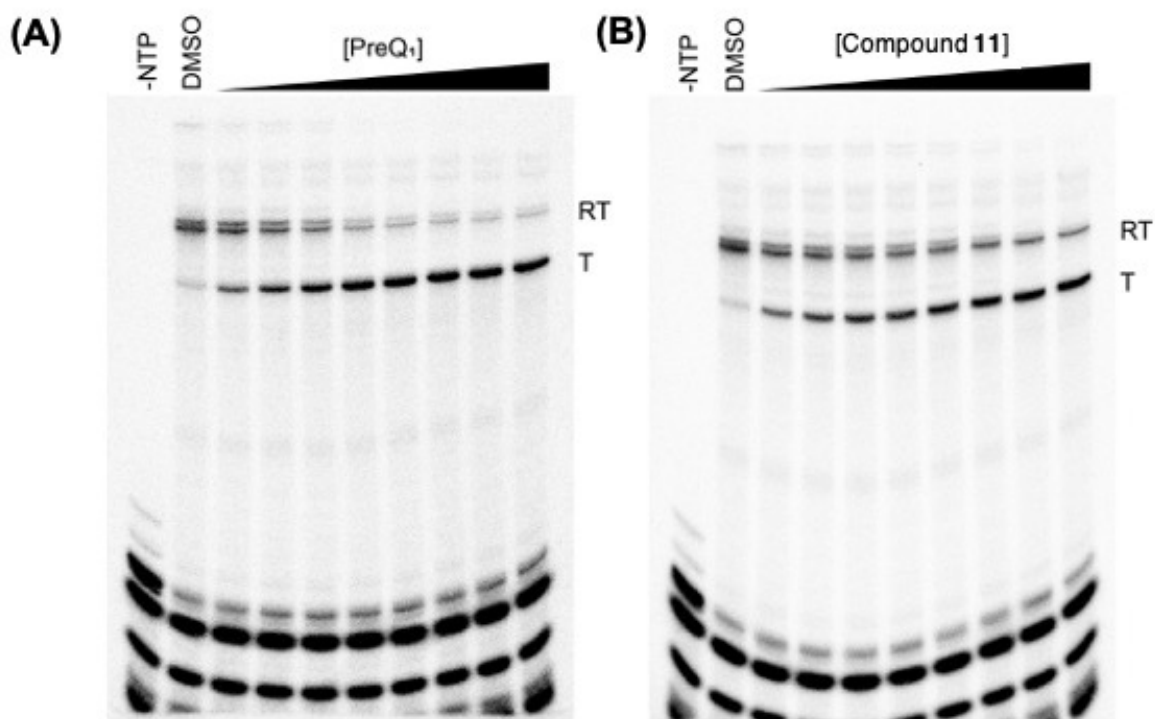

**Figure S6:** Representative PAGE gel images of the <sup>32</sup>P-labeled RNA products of in vitro transcription of the *Ss*-preQ<sub>1</sub>-RS template in the presence of increasing concentrations of (A) PreQ<sub>1</sub> and (B) 11. Bands corresponding to the read-through transcription product (RT) and terminated transcription product (T) are indicated. Each experiment was repeated three time independently. Source data are provided as a Source Data file.

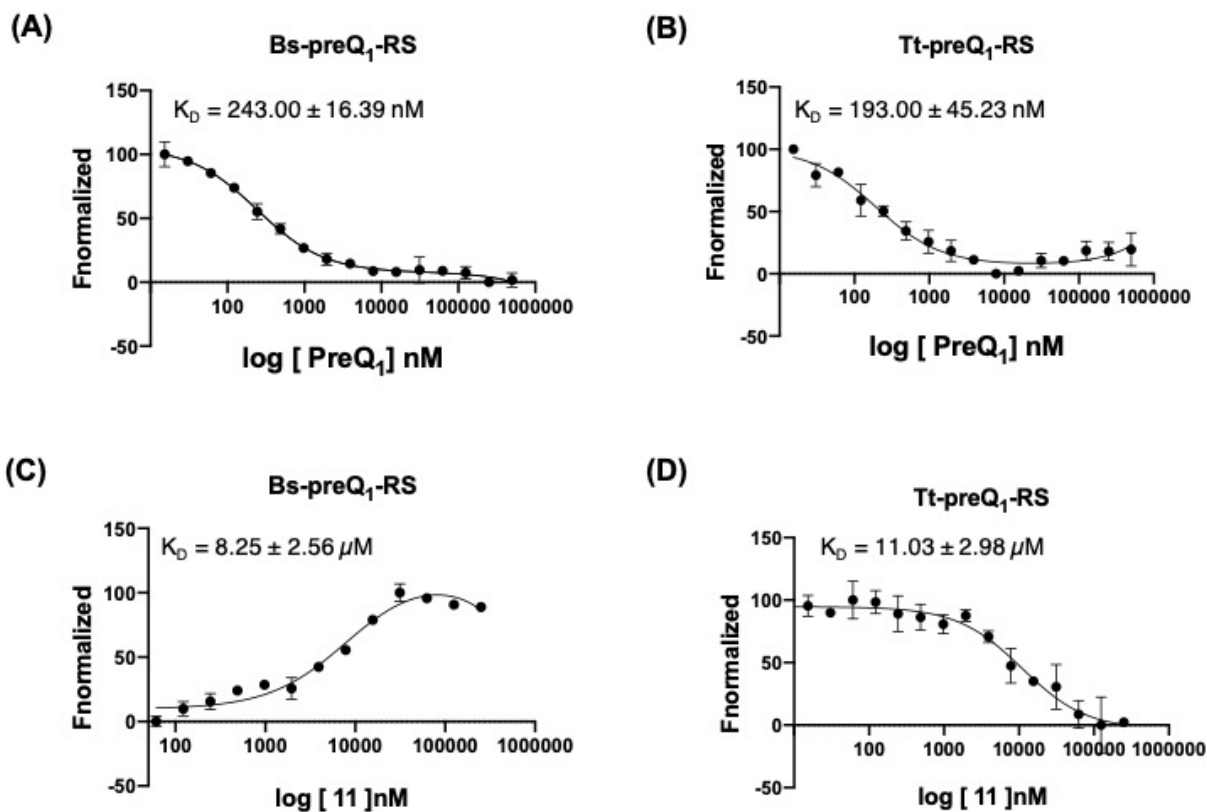

**Figure S7:** Binding curves generated by Microscale thermophoresis (MST) for binding of (A) PreQ<sub>1</sub> to the *Bs*-preQ<sub>1</sub>-RS aptamer, (B) **11** to the *Bs*-preQ<sub>1</sub>-RS aptamer, (C) PreQ<sub>1</sub> to the *Tt*-preQ<sub>1</sub>-RS aptamer and (D) **11** to the *Tt*-preQ<sub>1</sub>-RS aptamer. The opposite change in thermophoretic behavior suggest that aptamer undergo different conformation change upon binding to **11**. The binding constant was calculated by fitting the data in GraphPad Prism using a single-site mode of binding. The data are presented as the mean  $\pm$  SEM (n=3) of three independent experiments. Each experiment was repeated three time independently. Source data are provided as a Source Data file.

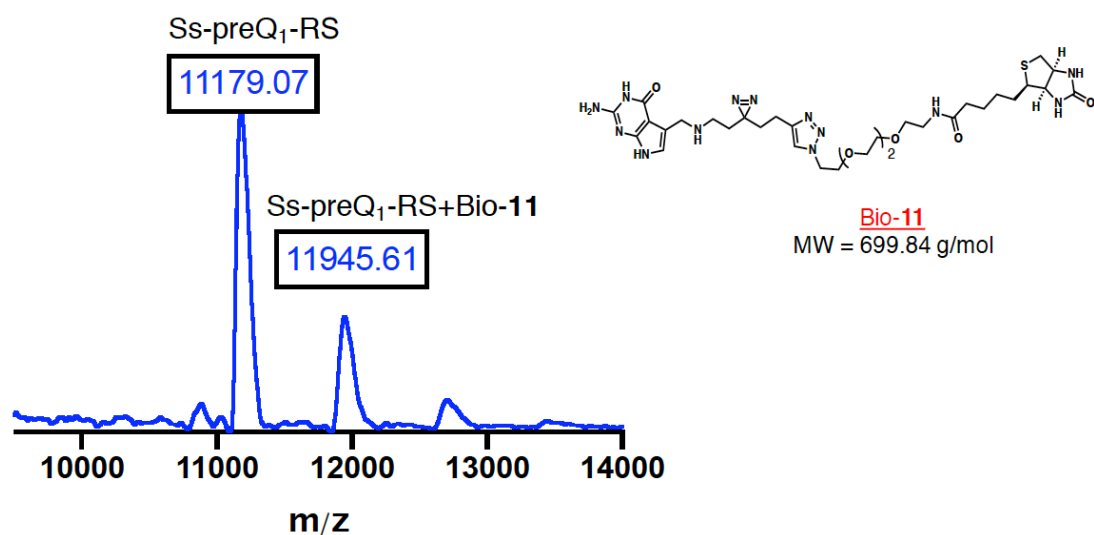

**Figure S8:** MALDI-TOF analysis of reactivity of Bio-11 towards the Ss-preQ<sub>1</sub>-RS aptamer. The appearance of the higher molecular weight species after UV irradiation confirms the formation of a covalent adduct between Bio-11 (500  $\mu$ M) and the Ss-preQ<sub>1</sub>-RS (10  $\mu$ M). While the specific identify of this adduct is unknown (multiple products will be formed upon UV irradiation) the observed mass is consistent with the addition of 1 equivalent of Bio-11 to the Ss-preQ<sub>1</sub>-RS.



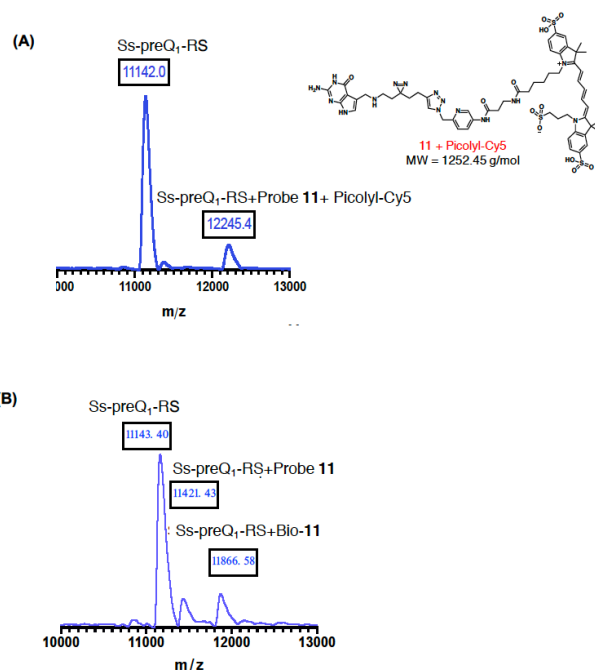

**Figure S9:** MALDI-TOF analysis of photocrosslinking and click catalyzed addition of **(A)** Cy5-picolyl-azide probe **(B)** biotin-(PEG)<sub>3</sub>-azide towards the Ss-preQ<sub>1</sub>-RS. In these experiments, the Ss-preQ<sub>1</sub>-RS (10  $\mu$ M) was first treated with 500  $\mu$ M of **11**. After incubation the sample was UV irradiated to crosslink **11** to the Ss-preQ<sub>1</sub>-RS. Finally, this mixture was treated with Cy5-picolyl-azide **(A)** and biotin-(PEG)<sub>3</sub>-azide **(B)** using the copper catalyzed click protocol described above. The higher molecular weight species indicated here is consistent with potential covalent adducts between the **11**-crosslinked-Ss-preQ<sub>1</sub>-RS and **(A)** Cy5-picolyl azide or **(B)** biotin-(PEG)<sub>2</sub>-azide. A peak corresponding to the adduct of Ss-preQ<sub>1</sub>-RS and **11** (no Bio-**11** click product) is visible in panel B due to incomplete reaction with the biotin-(PEG)<sub>3</sub>-azide under these conditions.

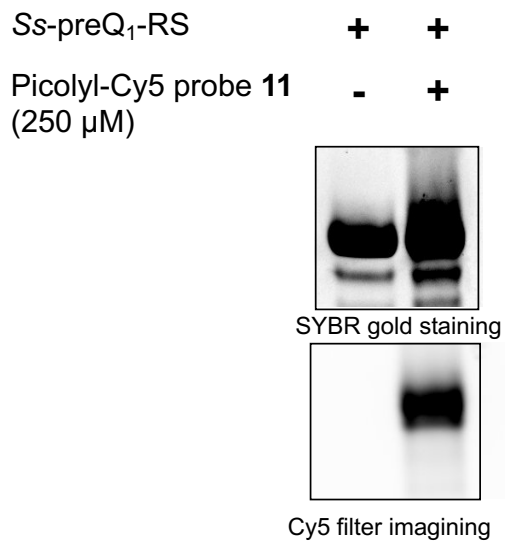

**Figure S10:** PAGE characterization of Cy5-picolyl probe cross-linked Ss-preQ<sub>1</sub>-RS by SYBR gold staining (top) and Cy5 filter imaging (bottom). The molar ratio between the Ss-PreQ<sub>1</sub>-RS (10 μM) and Cy5-picolyl probe **11** (500 μM) is 1:50. The experiment was repeated three time independently and full image was provided in the Source Data file.

|                                |   |   |   |     |   |   |   |   |   |
|--------------------------------|---|---|---|-----|---|---|---|---|---|
| <i>Bs-preQ<sub>1</sub></i> -RS | + | - | + | +   | + | + | - | + | + |
| Cell lysate                    | - | + | + | +   | + | + | + | + | + |
| Probe <b>11</b> (250 $\mu$ M)  | + | + | + | +   | + | + | - | - | - |
| PreQ <sub>1</sub> (mM)         | - | - | - | 0.5 | 1 | - | - | - | 1 |
| Probe <b>17</b> (250 $\mu$ M)  | - | - | - | -   | - | - | + | + | + |
| UV                             | + | + | + | +   | + | - | + | + | + |

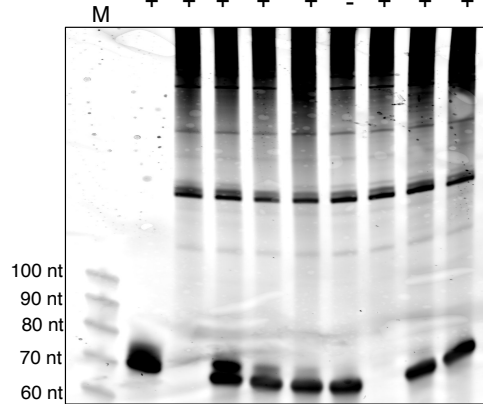

SYBR gold staining

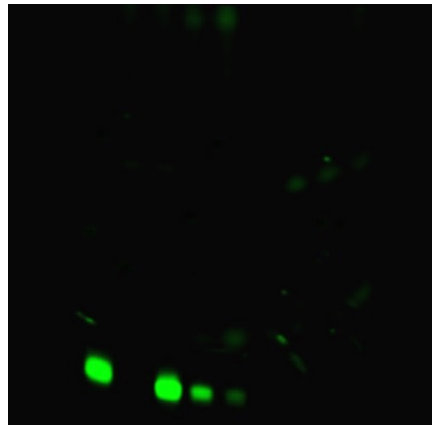

TAMRA Imaging

**Figure S11:** Competitive photocrosslinking experiments in MCF-7 total RNA imaged by SYBR gold stain (top) and TAMRA labeling (bottom). Compound **11** (250  $\mu$ M) selectively labeled the *Bs-preQ<sub>1</sub>*-RS full length (1  $\mu$ M, or 1.1  $\mu$ g) in the presence of cellular total RNA (5  $\mu$ g) while no detectable crosslinked product was observed with compound **17** (250  $\mu$ M). Co-incubation of **11** (250  $\mu$ M) with excess PreQ<sub>1</sub> (500  $\mu$ M and 1000  $\mu$ M concentrations) resulted in competitive decrease of TAMRA signal. The experiment was repeated three time independently.

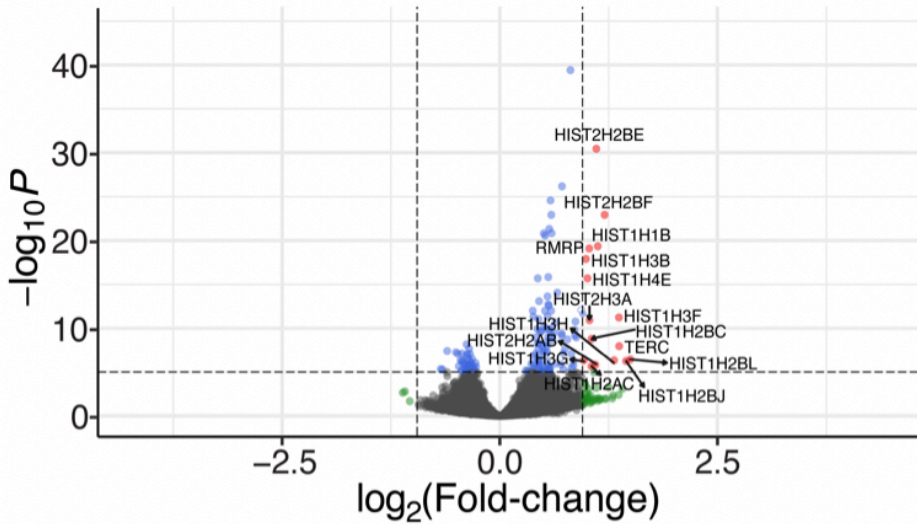

| Gene Symbol | $\log_2(\text{Fold-change})$ | Adj. P-value |
|-------------|------------------------------|--------------|
| HIST2H2BE   | 1.11                         | 3.5e-31      |
| HIST2H2BF   | 1.20                         | 1.2e-23      |
| HIST1H1B    | 1.12                         | 4.6e-20      |
| HIST1H3B    | 1.13                         | 4.6e-20      |
| RMRP        | 0.98                         | 1.3e-18      |
| HIST1H4E    | 1.01                         | 2.0e-16      |
| HIST2H3A    | 1.03                         | 1.2e-11      |
| HIST1H3F    | 1.37                         | 5.9e-12      |
| HIST1H2BC   | 1.05                         | 1.6e-9       |
| TERC        | 1.37                         | 1.1e-8       |
| HIST1H3H    | 1.31                         | 4.7e-7       |
| HIST1H3G    | 1.10                         | 1.5e-6       |
| HIST1H2BL   | 1.50                         | 3.8e-7       |
| HIST1H2BJ   | 1.45                         | 5.8e-7       |
| HIST1H2AC   | 1.05                         | 2.3e-6       |
| HIST2H2AB   | 1.40                         | 8.4e-4       |

**Figure S12:** Volcano Plot showing differential expression analysis (DeSeq2) between 11 and 17 treated samples. The points in red are significantly enriched ( $\log_2(\text{Fold-change}) > 0.95$ , adjusted p-value  $< 10^{-3}$ ). These hits are labelled with the gene name on the plot. Corresponding values for enrichment and significance are provided in the accompanying table.

## Section 2:

### Synthesis and characterization of electrophoretic and photoaffinity probes

#### A) Substitution reaction between PreQ<sub>1</sub> and alkyl halides

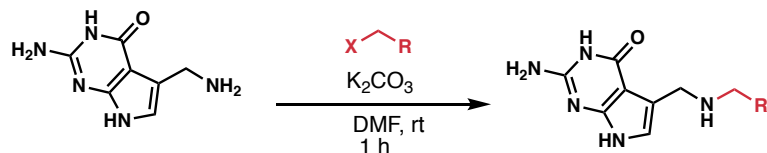

To a solution of PreQ<sub>1</sub>•2TFA (20 mg, 49  $\mu$ mol, 1.0 equiv.) in DMF, K<sub>2</sub>CO<sub>3</sub> (21 mg, 15  $\mu$ mol, 3.1 equiv.) and alkyl halide (49  $\mu$ mol, 1.0 equiv.) were added, and the reaction mixture was stirred at room temperature for 1 h. Then, the reaction mixture was concentrated, and purified via column chromatography on a silica gel using gradient based MeOH:DCM (0-20 % MeOH) on CombiFlash® Rf system.

#### B) Coupling reaction between PreQ<sub>1</sub> and carboxylic acid-based substrates

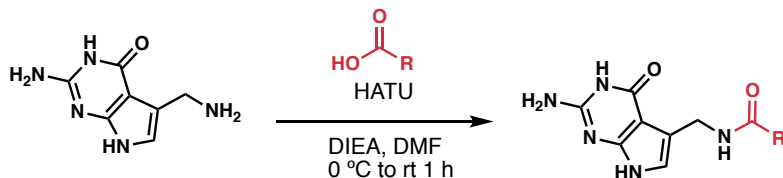

To a solution of a carboxylic acid substrate (37  $\mu$ mol, 1.0 equiv.) in DMF (1 mL) cooled to 0 °C, HATU (14 mg, 37  $\mu$ mol, 1.0 equiv.) and diisopropylethylamine (20  $\mu$ L, 118  $\mu$ mol, 3.2 equiv.) were added and stirred for 10 min. Then, PreQ<sub>1</sub>•2TFA (15 mg, 37  $\mu$ mol, 1.0 equiv.) was added, warmed the reaction mixture to room temperature and stirred for 1 hr. Then, the reaction mixture was concentrated and purified via column chromatography on a silica gel eluting with gradient based MeOH:DCM on CombiFlash® Rf system or preparative HPLC eluting with 10-90 % gradient of H<sub>2</sub>O:MeCN containing 0.1% TFA.

#### Mass Spectral Analysis

LC/MS analysis of accurate mass measurements was carried out on the Orbitrap LTQ-XL system. A 2.0- $\mu$ L aliquot of an analytical solution (about 58  $\mu$ g/ml in LC/MS-grade 1:1 CH<sub>3</sub>CN/H<sub>2</sub>O) was injected onto a 2.1 X 100 mm, 3.5- $\mu$ m Zorbax SB-C18 narrow-bore HPLC column and eluted at flow rate of 250  $\mu$ L/min with a 15-min combination of both isocratic and linear gradient elution using mobile phase varying from 2-90% CH<sub>3</sub>CN/H<sub>2</sub>O and containing 0.1% formic acid.

**Compound 1** (Methyl (*E*)-4-(((2-amino-4-oxo-4,7-dihydro-3*H*-pyrrolo[2,3-*d*]pyrimidin-5-yl)methyl)amino)but-2-enoate).

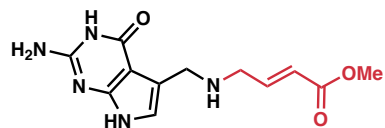

Prepared according to the general procedure **A** isolated as TFA salt (5.0 mg, 35% yield) . White solid.  $^1\text{H}$  NMR (500 MHz, DMSO):  $\delta$  11.32 (s, 1H), 10.97 (s, 1H), 9.37 (brs, 2H), 6.92-6.83 (m, 1H), 6.84 (s, 1H), 6.42 (brs, 2H), 6.24 (d,  $J = 15.4$  Hz, 1H), 4.20 (t,  $J = 5.2$  Hz, 2H), 3.86 (m, 2H), 3.71 (s, 1H);  $^{13}\text{C}\{^1\text{H}\}$  NMR (126 MHz, DMSO): 165.69, 160.81, 158.54 (q,  $J = 35.4$  Hz), 153.18, 152.58, 139.05, 125.68, 118.12, 115.4 (q,  $J = 294.0$  Hz), 108.54, 98.71, 52.23, 46.28, 43.18; HRMS  $m/z$ : calcd. for  $\text{C}_{12}\text{H}_{16}\text{N}_5\text{O}_3$   $[\text{M}+\text{H}]^+$  278.1248, found 278.1240.

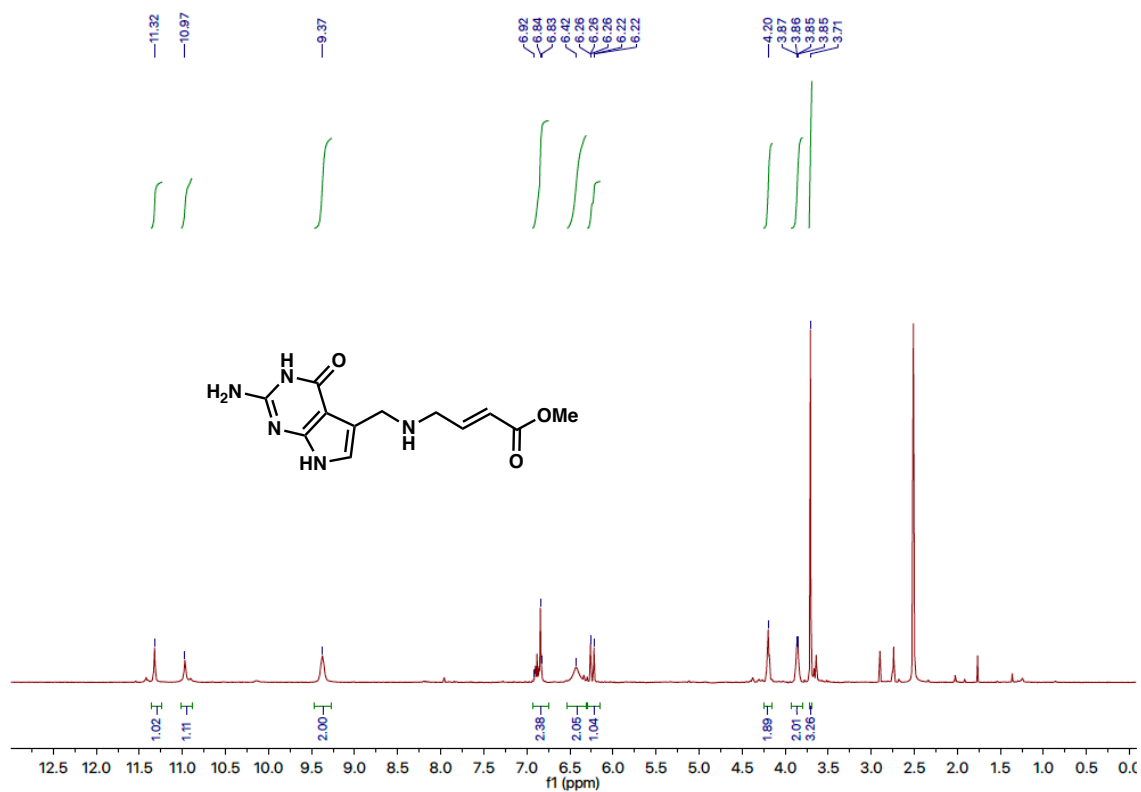

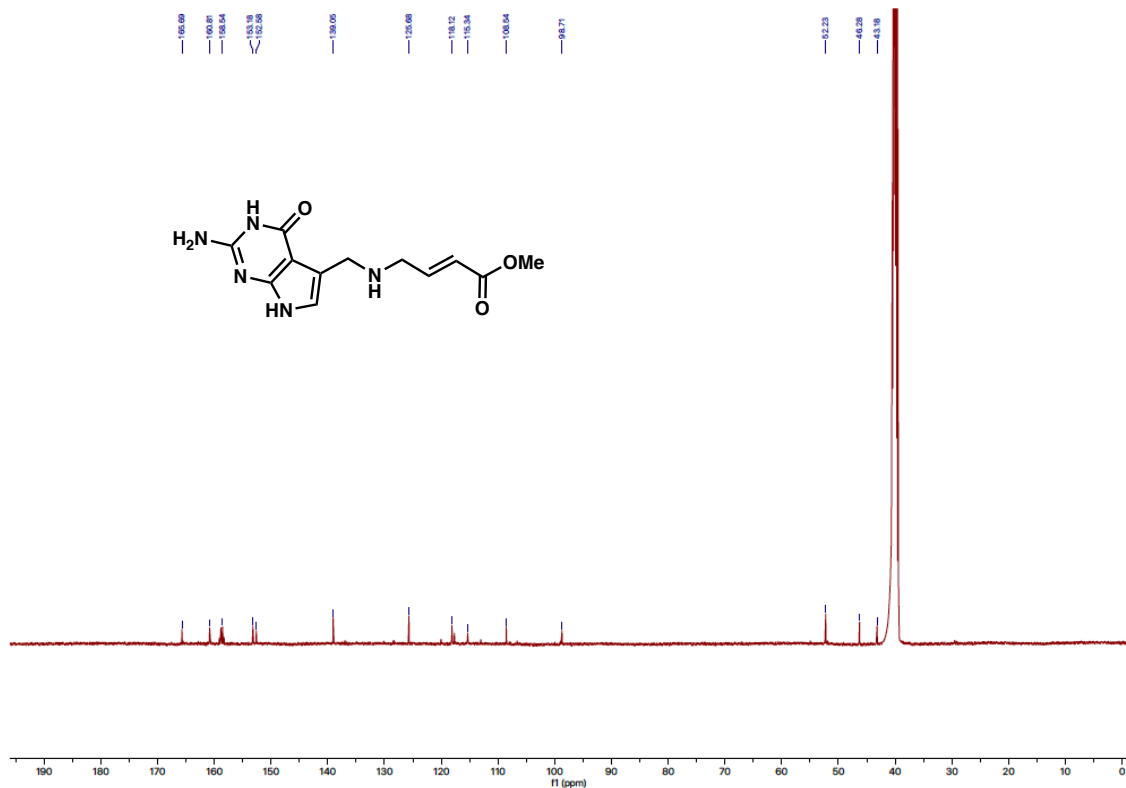

**Compound 2** (*N*-((2-amino-4-oxo-4,7-dihydro-3*H*-pyrrolo[2,3-*d*]pyrimidin-5-yl)methyl)methacrylamide).

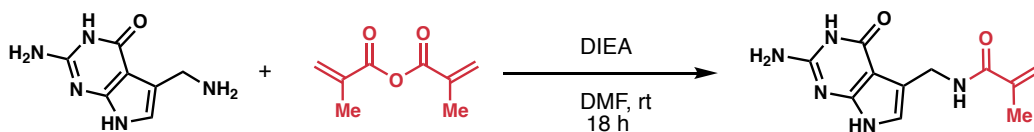

To a solution of PreQ<sub>1</sub>•2HCl (20 mg, 80  $\mu$ mol, 1.0 equiv.) and DIEA (30  $\mu$ L, 160  $\mu$ mol, 2.0 equiv.) in DMF (1.0 mL), methacrylic anhydride (15  $\mu$ L, 96  $\mu$ mol, 1.2 equiv.) was added and the reaction mixture was stirred at room temperature for 18 h. Then, the reaction mixture was concentrated and via column chromatography on a silica gel using MeOH:DCM. White solid. <sup>1</sup>H NMR (500 MHz, DMSO):  $\delta$  10.89 (s, 1H), 10.49 (s, 1H), 8.74 (t, *J* = 5.4 Hz, 1H), 6.54 (s, 1H), 6.14 (s, 2H), 5.70 (s, 1H), 5.33 (t, *J* = 1.6 Hz, 1H), 4.35 (d, *J* = 5.4 Hz, 2H), 1.89 (s, 3H); <sup>13</sup>C{<sup>1</sup>H} NMR (126 MHz, DMSO): 166.9, 160.4, 152.7, 152.3, 140.5, 119.5, 115.6, 114.2, 99.0, 35.8, 19.0; HRMS *m/z*: calcd. for C<sub>11</sub>H<sub>14</sub>N<sub>5</sub>O<sub>2</sub> [M+H]<sup>+</sup> 248.1142, found 248.1137.

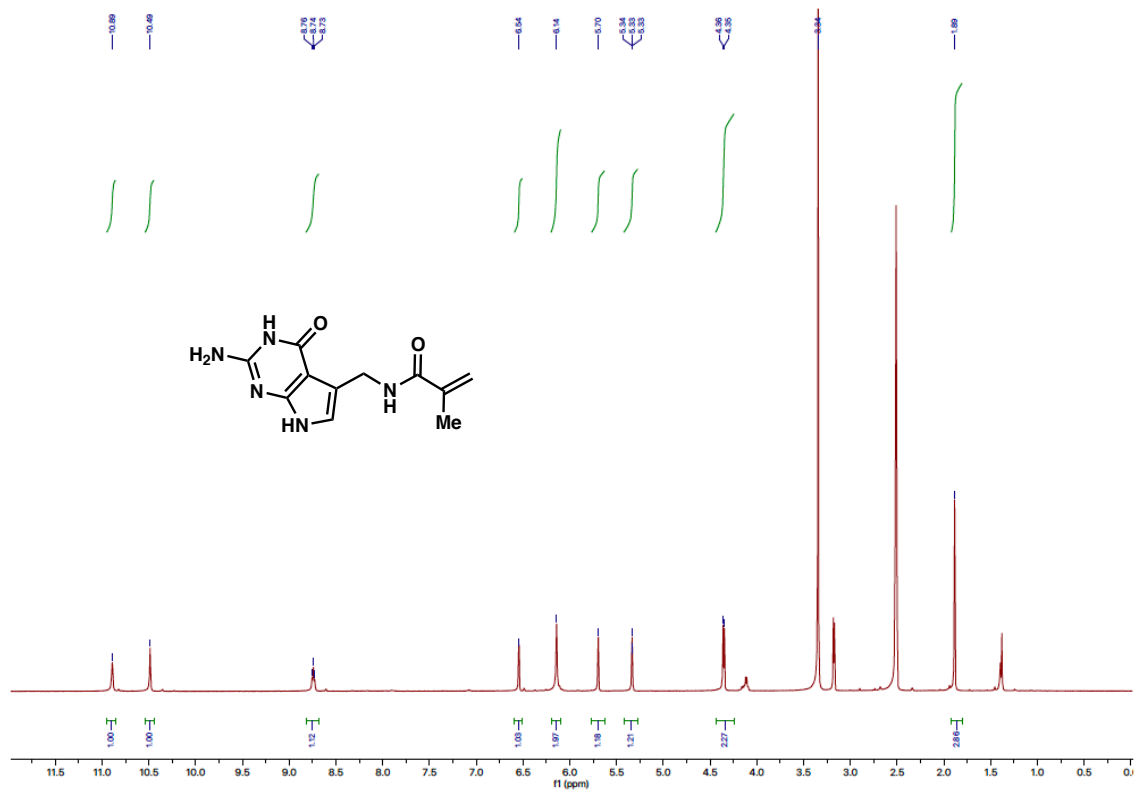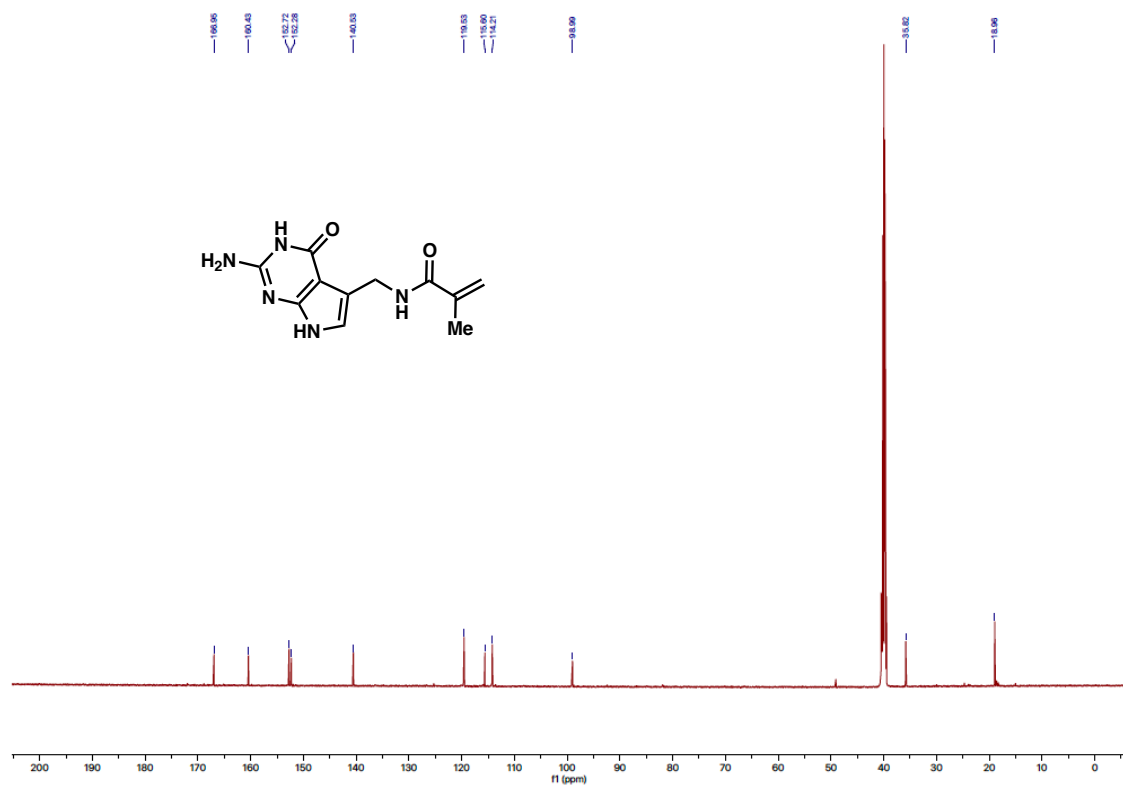

**Compound 3** ((*E*)-*N*-((2-amino-4-oxo-4,7-dihydro-3*H*-pyrrolo[2,3-*d*]pyrimidin-5-yl)methyl)-2-phenylethene-1-sulfonamide).



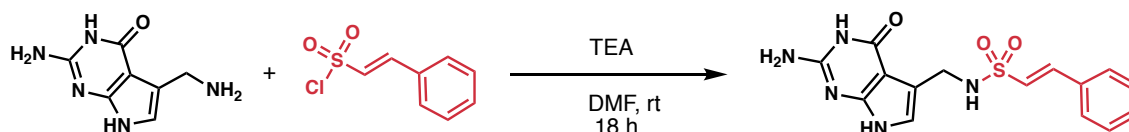

The reaction is run according the procedure for compound **6**. White solid.  $^1\text{H}$  NMR (500 MHz, DMSO):  $\delta$  10.88 (s, 1H), 10.67 (brs, 1H), 7.73 (brs, 1H), 7.56-7.54 (m, 2H), 7.41-7.38 (m, 3H), 7.30 (d,  $J = 15.6$  Hz, 1H), 7.03 (d,  $J = 15.6$  Hz, 1H), 6.59 (s, 1H), 6.21 (s, 2H), 4.15 (d,  $J = 3.8$  Hz, 2H);  $^{13}\text{C}\{^1\text{H}\}$  NMR (126 MHz, DMSO): 160.4, 152.9, 152.3, 139.4, 133.4, 130.8, 129.3, 128.6, 127.5, 114.8, 98.8; HRMS  $m/z$ : calcd. for  $\text{C}_{15}\text{H}_{16}\text{N}_5\text{O}_3\text{S}$   $[\text{M}+\text{H}]^+$  346.0968, found 346.0955.

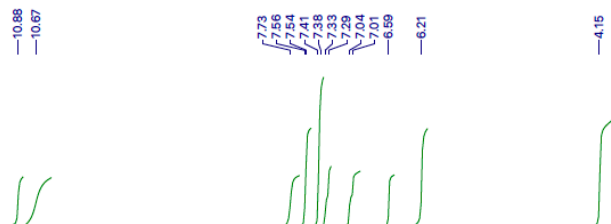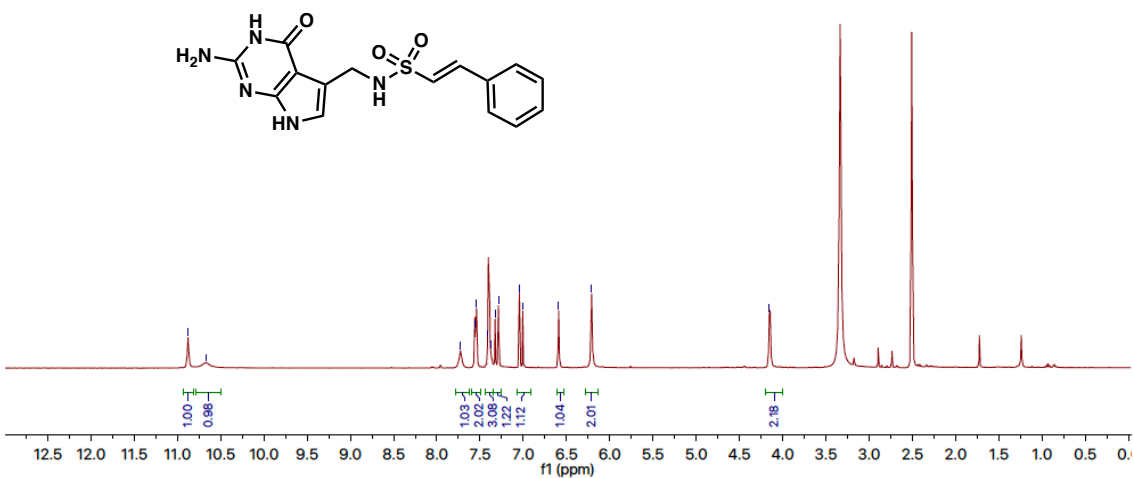

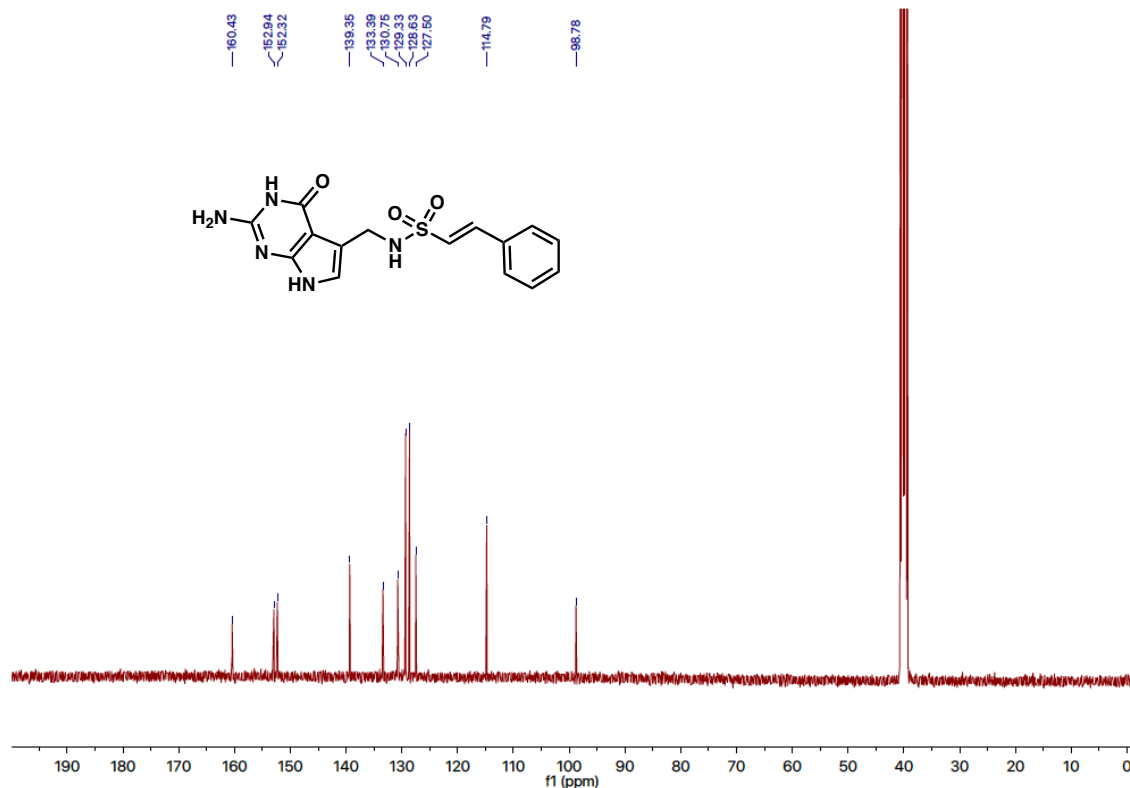

**Compound 4** (*N*-((2-amino-4-oxo-4,7-dihydro-3*H*-pyrrolo[2,3-*d*]pyrimidin-5-yl)methyl)-2-(2,5-dioxo-2,5-dihydro-1*H*-pyrrol-1-yl)acetamide).

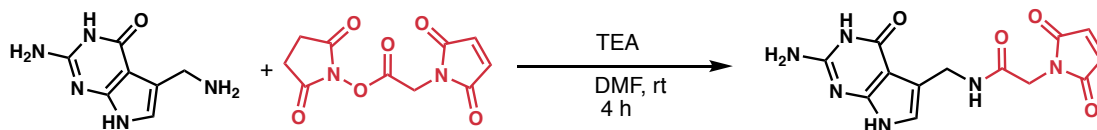

To a solution of PreQ<sub>1</sub>•2TFA (20 mg, 49  $\mu$ mol, 1.0 equiv.) and triethylamine (15  $\mu$ L, in DMF (1.0 mL) at room temperature, maleimidoacetic acid *N*-hydroxysuccinimide ester (12 mg, 49  $\mu$ mol, 1.0 equiv.) was added and stirred for 4 h. Then, the reaction mixture was concentrated, and purified via column chromatography using a silica gel and eluting with gradient based MeOH:DCM to obtain the titled compound as a white solid. <sup>1</sup>H NMR (500 MHz, DMSO):  $\delta$  10.86 (s, 1H), 10.34 (s, 1H), 8.57 (t, *J* = 5.4 Hz, 1H), 7.11 (s, 2H), 6.49 (s, 1H), 6.08 (s, 2H), 4.30 (d, *J* = 5.4 Hz, 2H), 4.04 (s, 2H); <sup>13</sup>C{<sup>1</sup>H} NMR (126 MHz, DMSO): 171.18, 165.99, 159.95, 152.73, 151.96, 135.33, 115.36, 114.34, 98.78, 35.67; HRMS *m/z*: calcd. for C<sub>13</sub>H<sub>13</sub>N<sub>6</sub>O<sub>4</sub> [M+H]<sup>+</sup> 317.0993, found 317.0982.

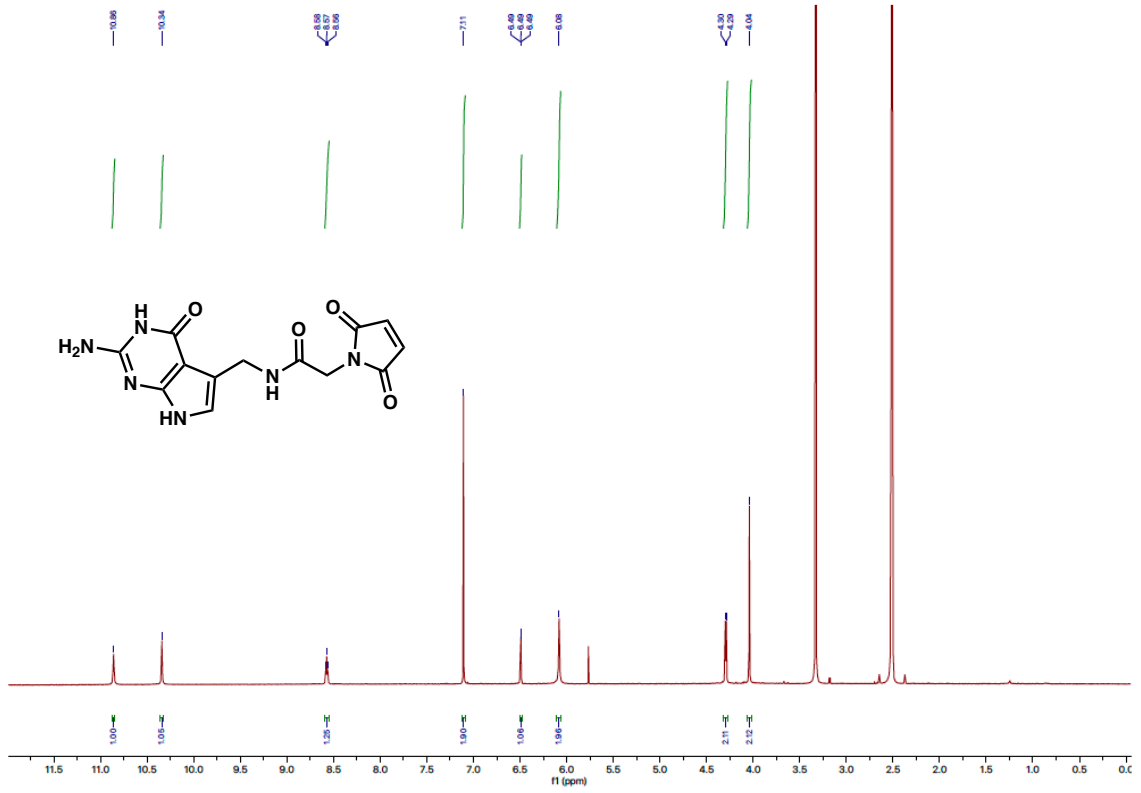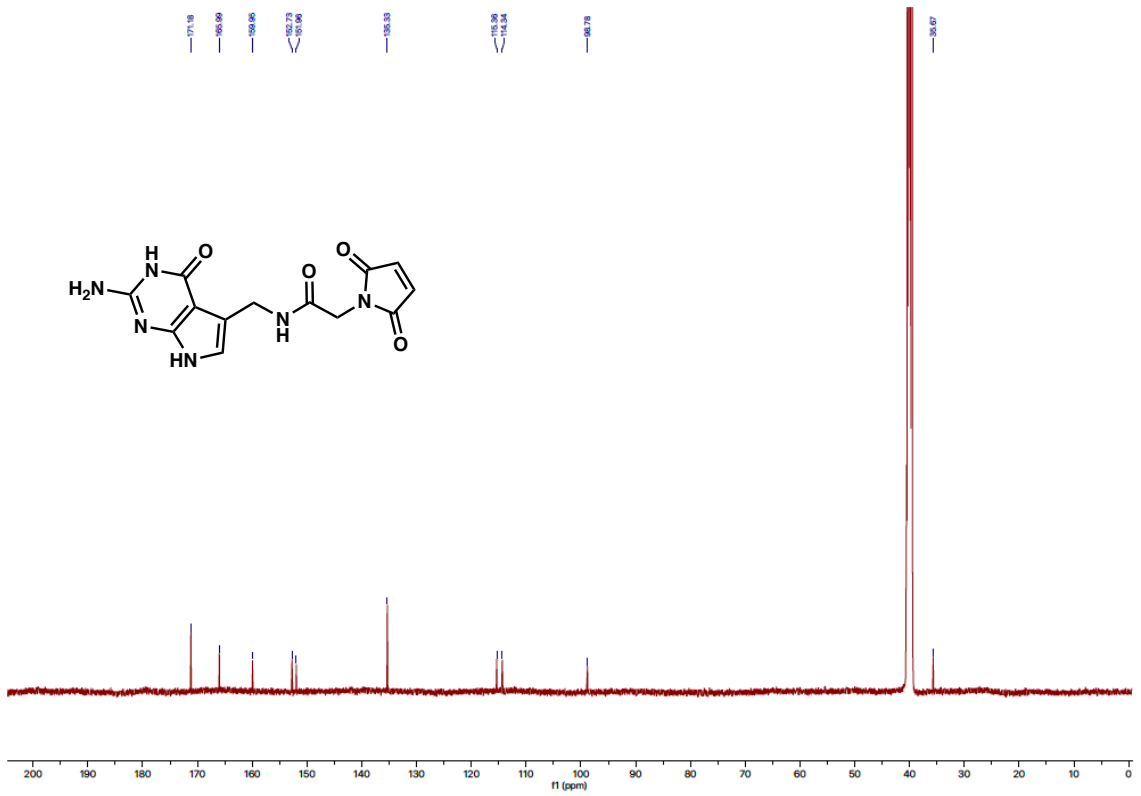

**Compound 5** (*N*-((2-amino-4-oxo-4,7-dihydro-3*H*-pyrrolo[2,3-*d*]pyrimidin-5-yl)methyl)-3-(2,5-dioxo-2,5-dihydro-1*H*-pyrrol-1-yl)propenamide).

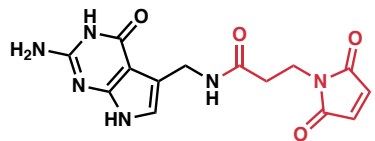

Prepared according to the procedure described for Compound 4. White solid.  $^1\text{H}$  NMR (500 MHz, DMSO):  $\delta$  10.82 (s, 1H), 10.31 (s, 1H), 8.29 (t,  $J = 5.4$  Hz, 1H), 6.97 (s, 2H), 6.46 (brs, 1H), 6.07 (s, 2H), 4.24 (d,  $J = 5.1$  Hz, 2H), 3.62 (m, 2H), 2.37 (m, 2H);  $^{13}\text{C}\{^1\text{H}\}$  NMR (126 MHz, DMSO): 171.2, 169.2, 160.0, 152.7, 151.9, 135.0, 115.7, 114.3, 98.8, 46.2, 35.5, 34.5; HRMS  $m/z$ : calcd. for  $\text{C}_{14}\text{H}_{15}\text{N}_6\text{O}_4$   $[\text{M}+\text{H}]^+$  331.1149, found 331.1138.

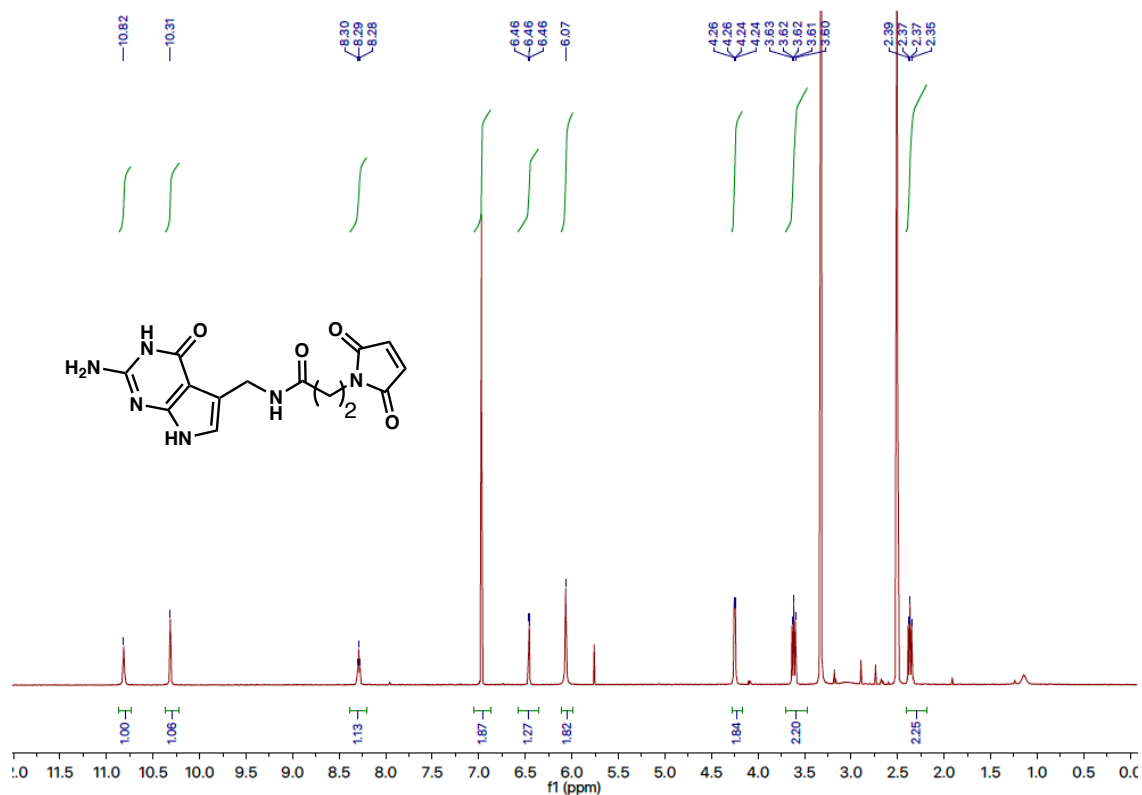

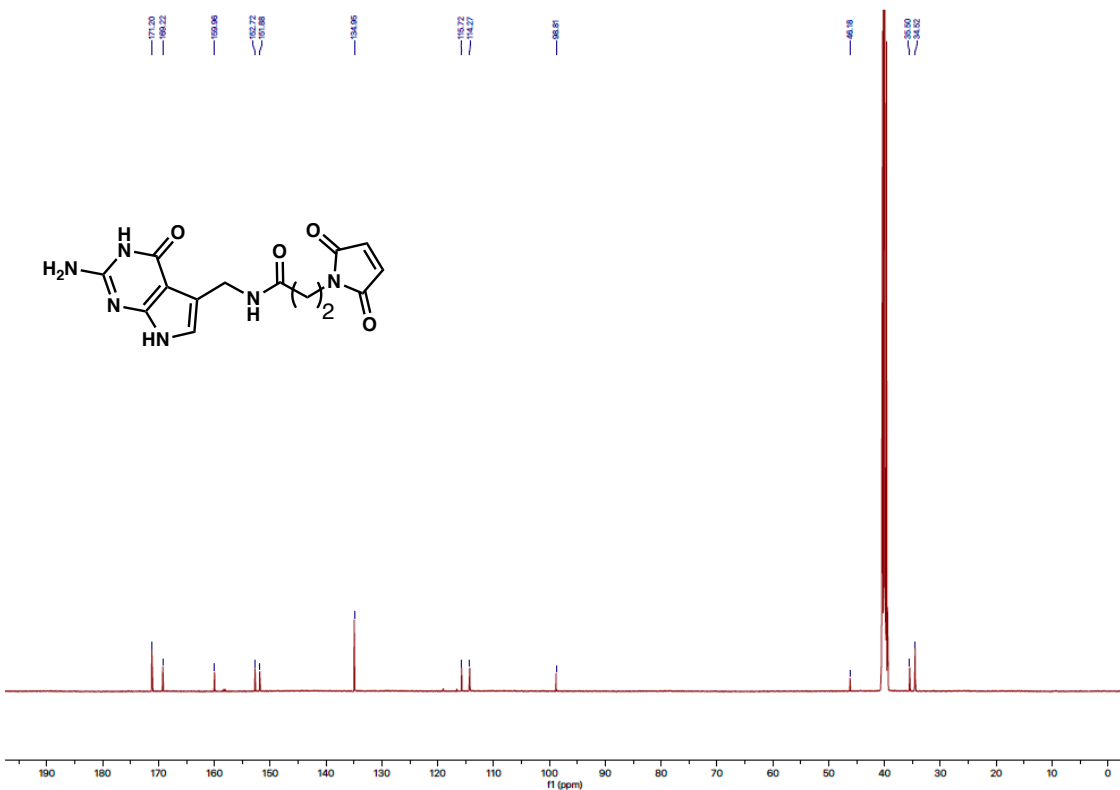

**Compound 6** (Ethyl ((2-amino-4-oxo-4,7-dihydro-3H-pyrrolo[2,3-d]pyrimidin-5-yl)methyl)carbamate).

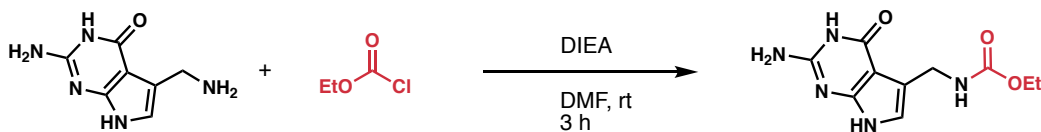

A solution of PreQ<sub>1</sub>·2HCl (20 mg, 80  $\mu$ mol, 1.0 equiv.) in DMF (1.0 mL) and cooled to 0 °C was treated with diisopropylethylamine (27  $\mu$ L, 160  $\mu$ mol, 2.0 equiv.). Then, ethyl chloroformate (8  $\mu$ L, 88  $\mu$ mol, 1.1 equiv.) was added, the reaction mixture was allowed to warm to room temperature and stirred for 3 h. Consequently, the reaction mixture was concentrated, triturated with 20% MeOH/DCM, and the resulting precipitate was collected to obtain the titled compound as a white solid. <sup>1</sup>H NMR (500 MHz, DMSO):  $\delta$  11.31 (s, 1H), 11.23 (s, 1H), 7.31 (s, 1H), 6.58 (s, 1H), 4.23 (s, 2H), 3.99 (q,  $J$  = 7.1 Hz, 2H), 1.16 (t,  $J$  = 7.1 Hz, 3H); <sup>13</sup>C{<sup>1</sup>H} NMR (126 MHz, DMSO): 158.2, 156.1, 151.5, 116.8, 114.5, 98.4, 59.7, 36.5, 14.7; HRMS  $m/z$ : calcd. for C<sub>10</sub>H<sub>14</sub>N<sub>5</sub>O<sub>3</sub> [M+H]<sup>+</sup> 252.1091, found 252.1084.

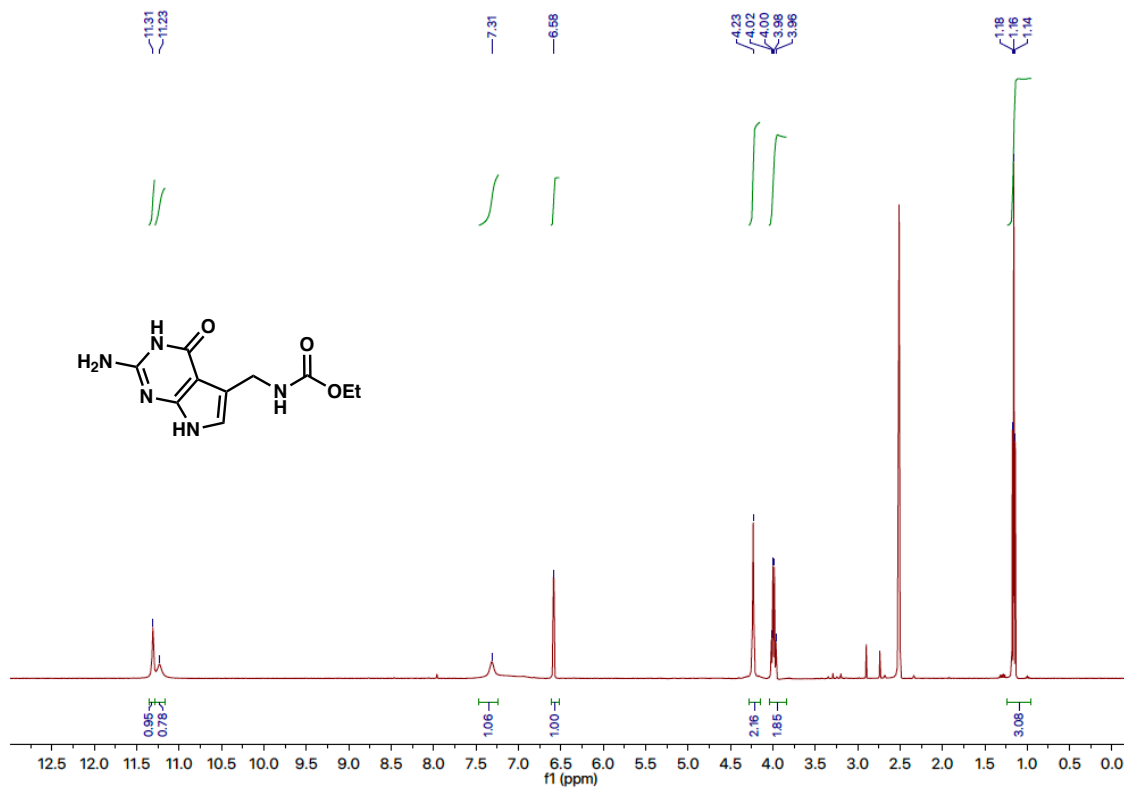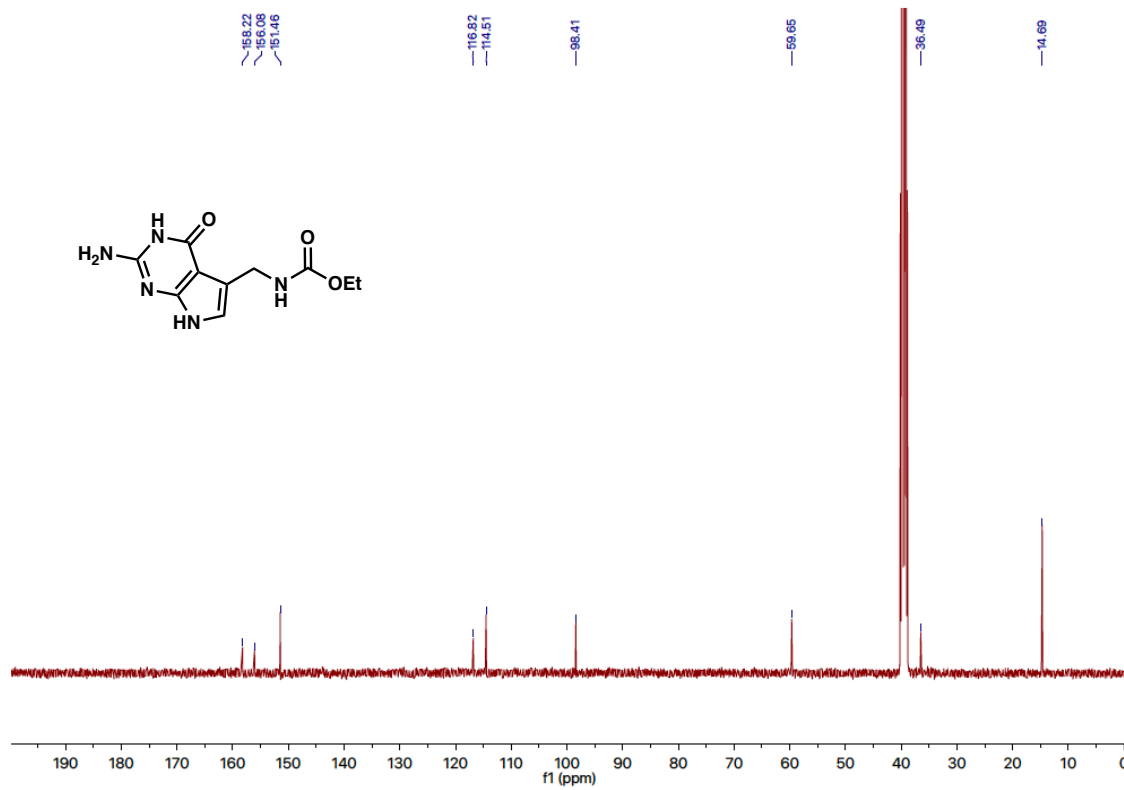

**Compound 7** (4-nitrophenyl ((2-amino-4-oxo-4,7-dihydro-3H-pyrrolo[2,3-d]pyrimidin-5-yl)methyl)carbamate).

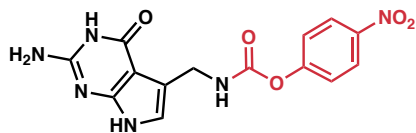

Prepared according the procedure for compound **9**. White solid.  $^1\text{H}$  NMR (500 MHz, DMSO):  $\delta$  10.92 (s, 1H), 10.43 (s, 1H), 8.37 (s, 1H), 8.27 (d,  $J = 8.2$  Hz, 2H), 7.43 (d,  $J = 8.2$  Hz, 2H), 6.61 (s, 1H), 6.13 (s, 2H), 4.36 (brs, 2H);  $^{13}\text{C}\{^1\text{H}\}$  NMR (125 MHz, DMSO): 160.10, 153.36, 152.81, 152.14, 144.58, 125.58, 125.58, 123.00, 115.12, 114.50, 98.80, 37.76; HRMS  $m/z$ : calcd. for  $\text{C}_{14}\text{H}_{13}\text{N}_6\text{O}_5$   $[\text{M}+\text{H}]^+$  345.0942, found 345.0933.

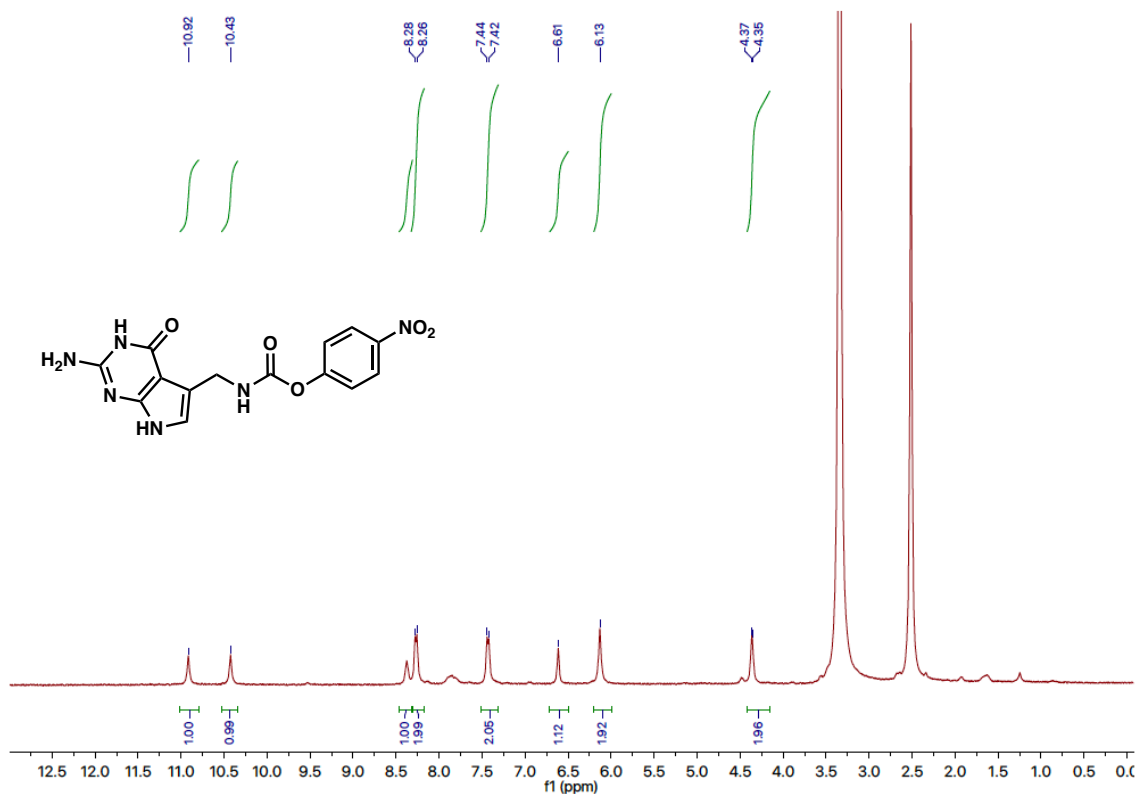

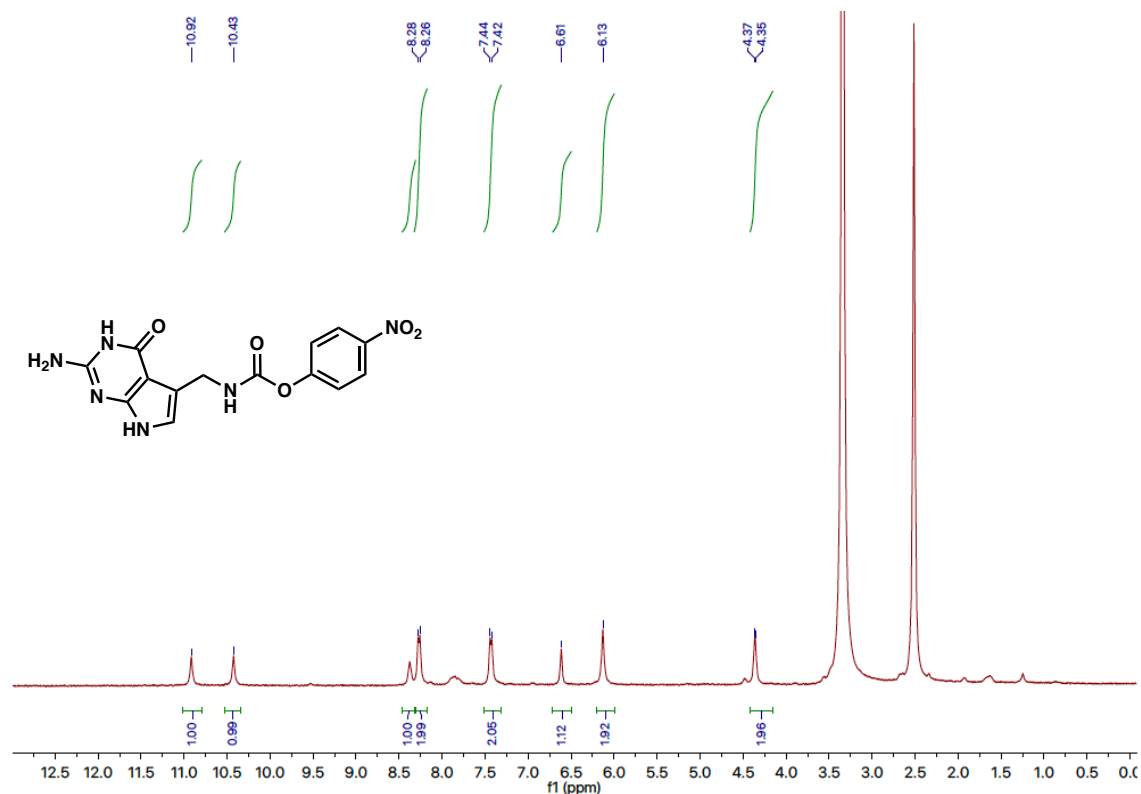

**Compound 8** (*N*-((2-amino-4-oxo-4,7-dihydro-3*H*-pyrrolo[2,3-*d*]pyrimidin-5-yl)methyl)-1*H*-imidazole-1-carboxamide).

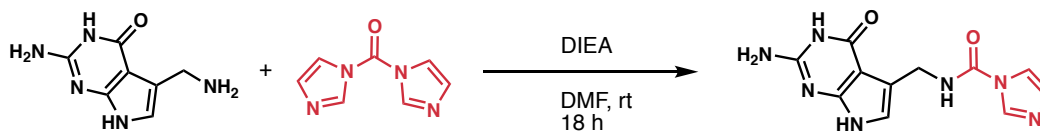

To a solution of PreQ<sub>1</sub>·2HCl (20 mg, 80 μmol, 1.0 equiv.) in DMF (1.0 mL), carbonyldiimidazole was added and the resulting reaction mixture was stirred at room temperature for 18 h. Then, the reaction mixture was concentrated, triturated with 20% MeOH/DCM, and the resulting precipitate was collected to obtain the titled compound as a white solid. <sup>1</sup>H NMR (500 MHz, DMSO): δ 11.03 (s, 1H), 10.58 (s, 1H), 9.39 (t, *J* = 5.3 Hz, 1H), 8.30 (s, 1H), 7.73 (s, 1H), 7.09 (s, 1H), 6.70 (s, 1H), 6.21 (s, 2H), 4.56 (d, *J* = 5.3 Hz, 2H); <sup>13</sup>C{<sup>1</sup>H} NMR (126 MHz, DMSO): 159.88, 152.27, 151.77, 148.42, 135.87, 129.57, 116.44, 114.43, 114.12, 98.32, 36.75; HRMS *m/z*: calcd. for C<sub>11</sub>H<sub>12</sub>N<sub>7</sub>O<sub>2</sub> [M+H]<sup>+</sup> 274.1047, found 274.1040.



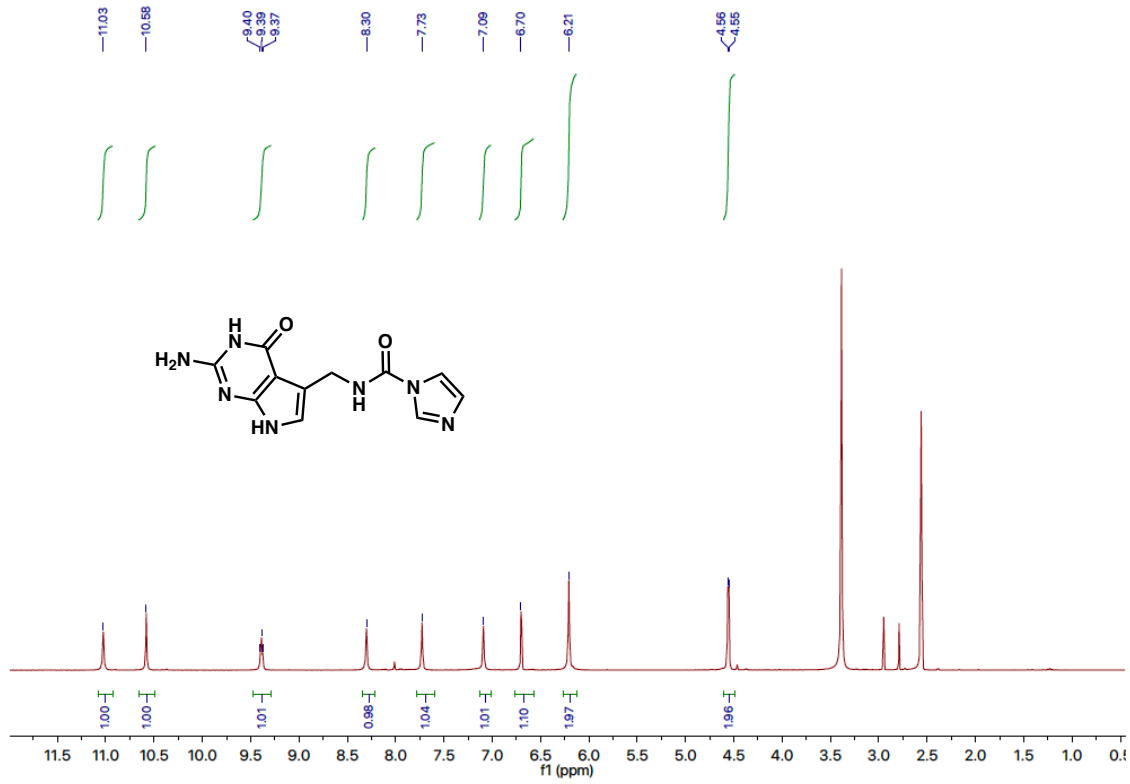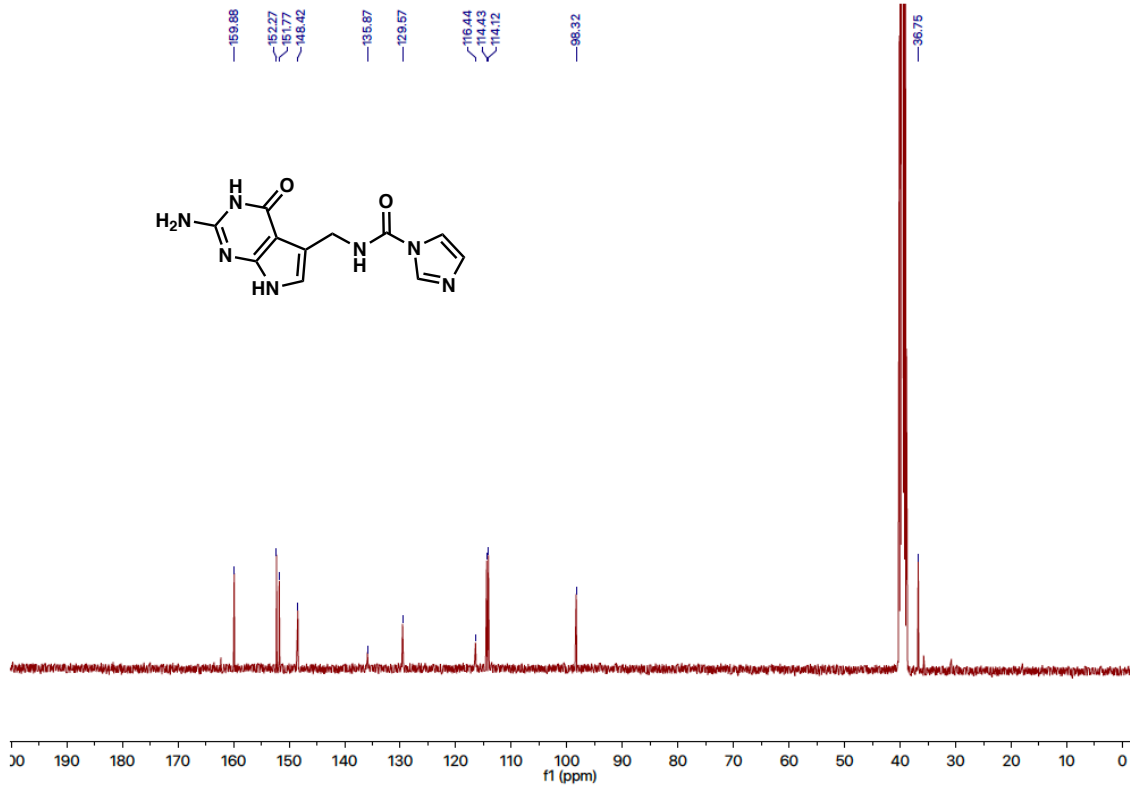

**Compound 9** (3-(((2-amino-4-oxo-4,7-dihydro-3*H*-pyrrolo[2,3-*d*]pyrimidin-5-yl)methyl)amino)-4-methoxycyclobut-3-ene-1,2-dione).

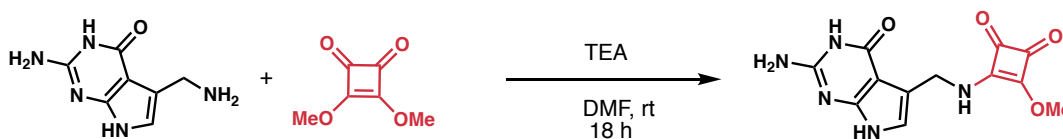

To a solution of PreQ<sub>1</sub>•2TFA in anhydrous DMF (600  $\mu$ L) under N<sub>2</sub>, dimethyl squarate (7.0 mg, 49  $\mu$ mol, 1.0 equiv.) and triethylamine (15  $\mu$ L, 103  $\mu$ mol, 2.1 equiv.) dissolved in anhydrous DMF (400  $\mu$ L) was added and stirred at room temperature for 18 h. Then, the reaction mixture was concentrated under reduced pressure, diluted with 1.0 mL of MeOH, and resulting precipitate was collected by filtration to obtain the titled compound as a white solid (57% yield). <sup>1</sup>H NMR (500 MHz, DMSO):  $\delta$  10.94 (s, 1H), 10.37 (s, 1H), 9.02-8.92 (s, 1H), 6.58 (d, *J* = 2.1 Hz, 1H), 6.13 (s, 2H), 4.75 (d, *J* = 5.6 Hz, 1H), 4.54 (d, *J* = 5.6 Hz, 1H), 4.30-4.27 (s, 3H); <sup>13</sup>C{<sup>1</sup>H} NMR (126 MHz, DMSO): 190.0, 189.7, 172.5, 172.2, 159.9, 159.9, 157.5, 152.9, 152.5, 152.2, 114.9, 114.4, 98.6, 98.6, 60.6, 60.3, 41.1 (Note that the compound exist as a mixture of tautomers and as a result, there are more carbon peaks observed); HRMS *m/z*: calcd. for C<sub>12</sub>H<sub>12</sub>N<sub>5</sub>O<sub>4</sub> [M+H]<sup>+</sup> 290.0884, found 290.0877.

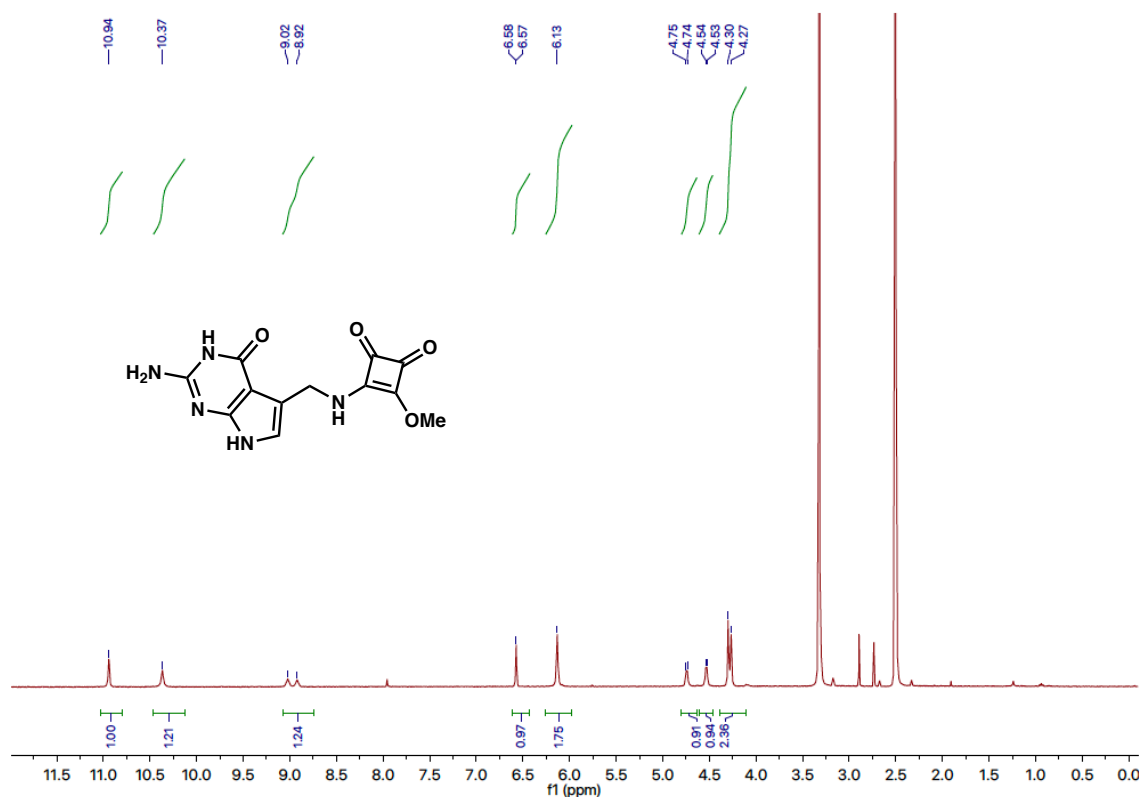

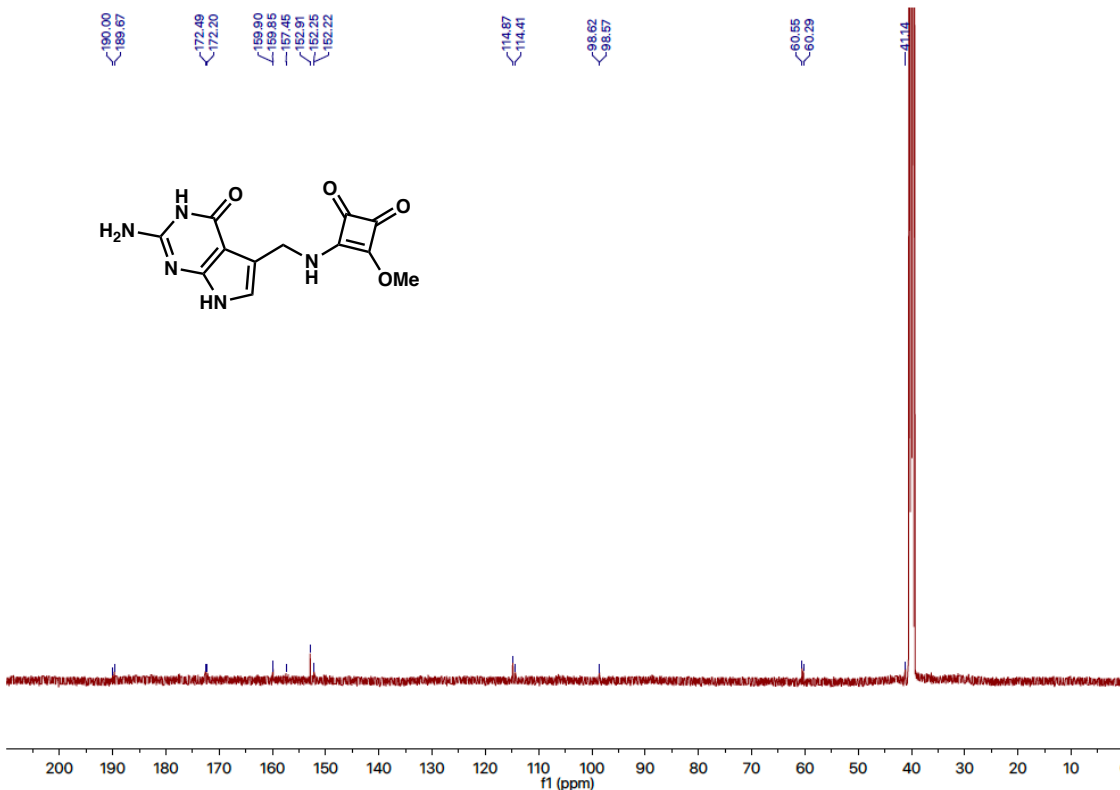

**Compound 10** (*N*-((2-amino-4-oxo-4,7-dihydro-3*H*-pyrrolo[2,3-*d*]pyrimidin-5-yl)methyl)-4-(4-(bis(2-chloroethyl)amino)phenyl)butanamide).

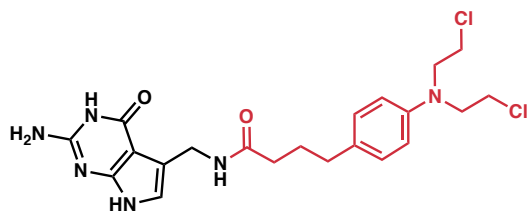

Prepared according to the general procedure **B**.

<sup>1</sup>H NMR (500 MHz, DMSO):  $\delta$  10.89 (s, 1H), 10.44 (s, 1H), 8.24 (t,  $J = 5.4$  Hz, 1H), 7.06 (d,  $J = 8.7$  Hz, 2H), 6.71 (d,  $J = 8.7$  Hz, 2H), 6.54 (s, 1H), 6.18 (s, 2H), 4.35 (d,  $J = 5.3$  Hz, 2H), 3.79-3.73 (m, 8H), 2.47 (t,  $J = 7.5$  Hz, 2H), 2.16 (t,  $J = 7.5$  Hz, 2H), 1.79 (qt,  $J = 7.5$  Hz, 2H); <sup>13</sup>C{<sup>1</sup>H} NMR (126 MHz, DMSO): 71.7, 160.0, 152.7, 152.0, 144.8, 130.4, 129.8, 116.0, 114.1, 112.3, 98.8, 52.7, 41.6, 35.6, 35.5, 34.1, 27.9; HRMS *m/z*: calcd. for C<sub>21</sub>H<sub>27</sub>Cl<sub>2</sub>N<sub>6</sub>O<sub>2</sub> [M+H]<sup>+</sup> 465.1567, found 465.1555.

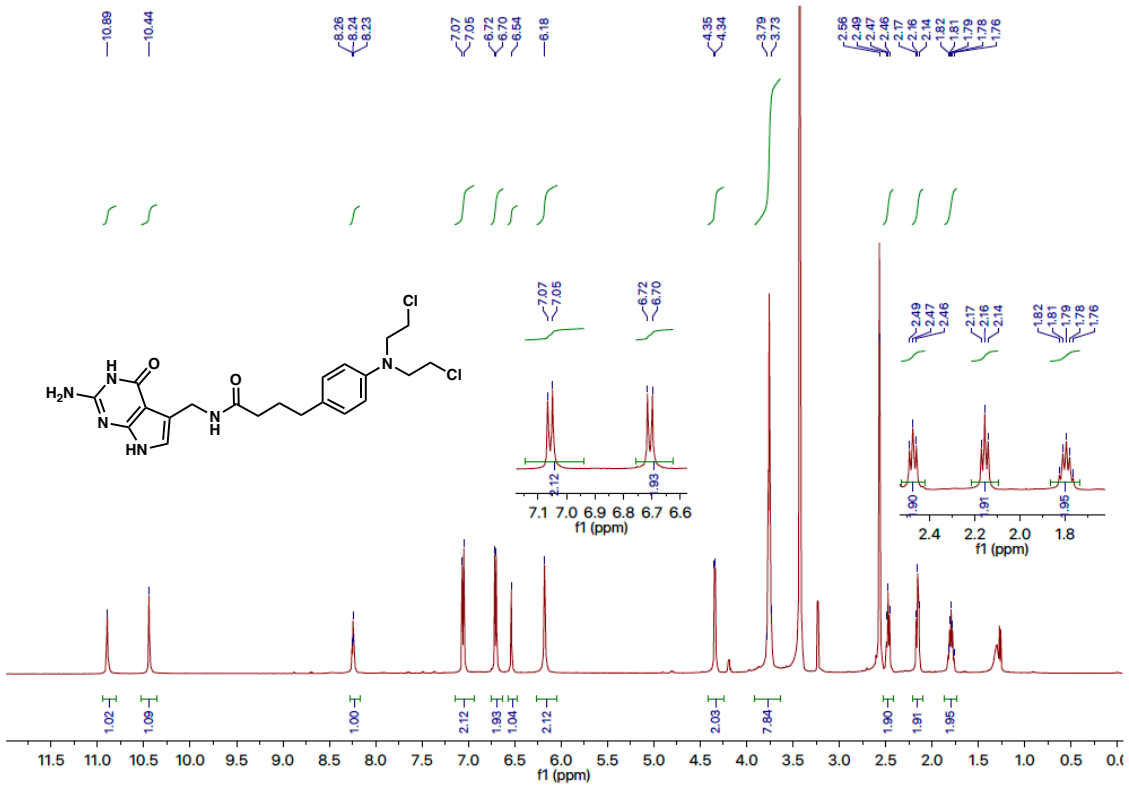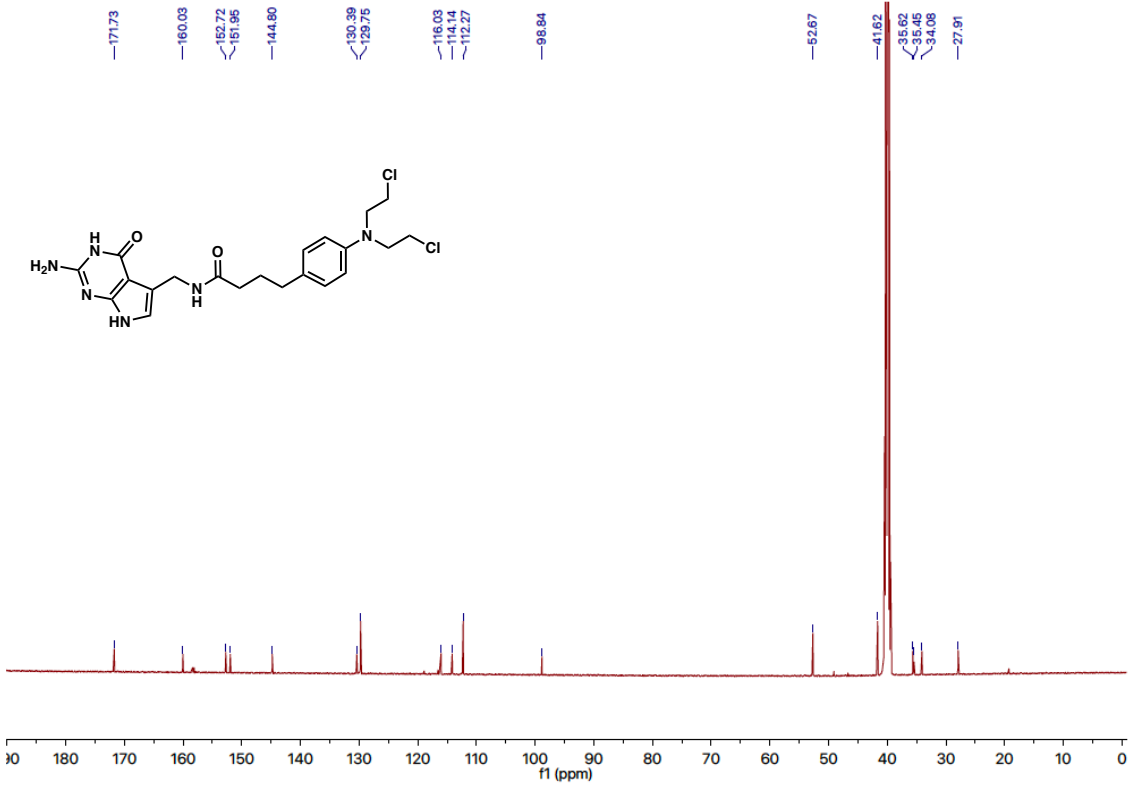

**Compound 11** (2-amino-5-(((2-(3-(but-3-yn-1-yl)-3*H*-diazirin-3-yl)ethyl)amino)methyl)-3,7-dihydro-4*H*-pyrrolo[2,3-*d*]pyrimidin-4-one).

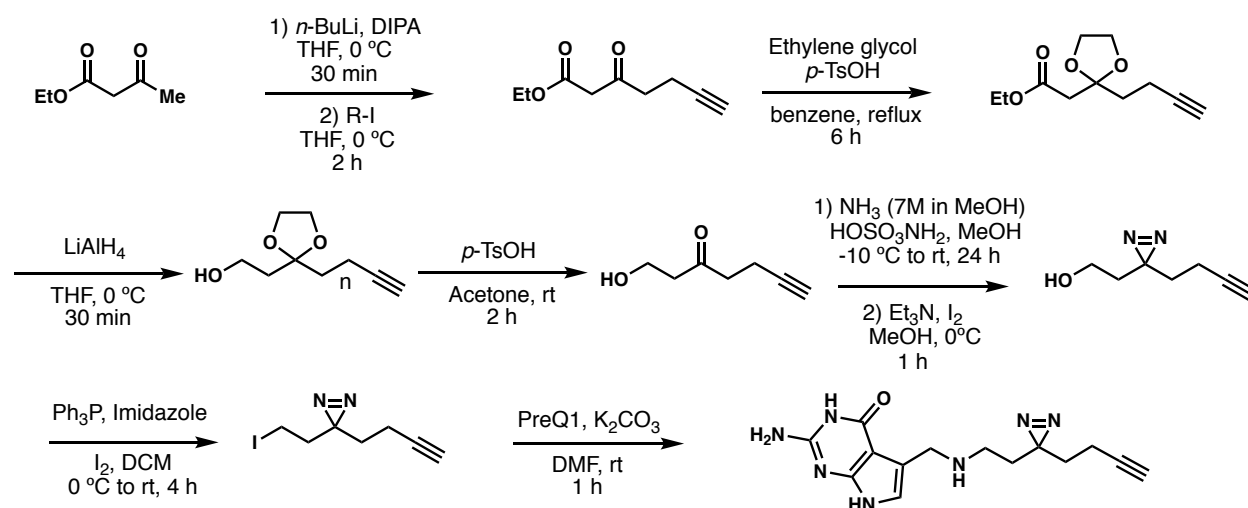

To a solution of PreQ<sub>1</sub>·2TFA (40 mg, 98  $\mu$ mol, 1.0 equiv.) and K<sub>2</sub>CO<sub>3</sub> (43 mg, 314  $\mu$ mol, 3.2 equiv.) in DMF (1.0 mL), 3-(but-3-yn-1-yl)-3-(2-iodoethyl)-3*H*-diazirine (prepared according to the literature procedure (25  $\mu$ L, 98  $\mu$ mol, 1.0 equiv.) in MeCN (0.5 mL) was slowly added and stirred at room temperature for 1 h in dark. Then, the reaction mixture was concentrated and purified via column chromatography using a silica gel and eluting with gradient based MeOH:DCM to obtain the titled compound as a white solid. <sup>1</sup>H NMR (500 MHz, DMSO):  $\delta$  11.27 (s, 1H), 10.85 (brs, 1H), 8.87 (brs, 1H), 6.81 (s, 1H), 6.32 (s, 2H), 4.14 (s, 2H), 2.91-2.87 (m, 2H), 2.85 (t, *J* = 2.7 Hz, 1H), 2.00 (td, *J* = 7.3, 2.7 Hz, 2H), 1.75-1.71 (m, 2H), 1.63 (t, *J* = 7.3 Hz, 2H); <sup>13</sup>C{<sup>1</sup>H} NMR (126 MHz, DMSO): 160.8, 153.2, 152.7, 117.9, 108.7, 98.7, 83.4, 72.4, 43.4, 41.3, 31.2, 29.8, 26.9, 13.1; HRMS *m/z*: calcd. for C<sub>14</sub>H<sub>18</sub>N<sub>7</sub>O [M+H]<sup>+</sup> 300.1567, found 300.1558.

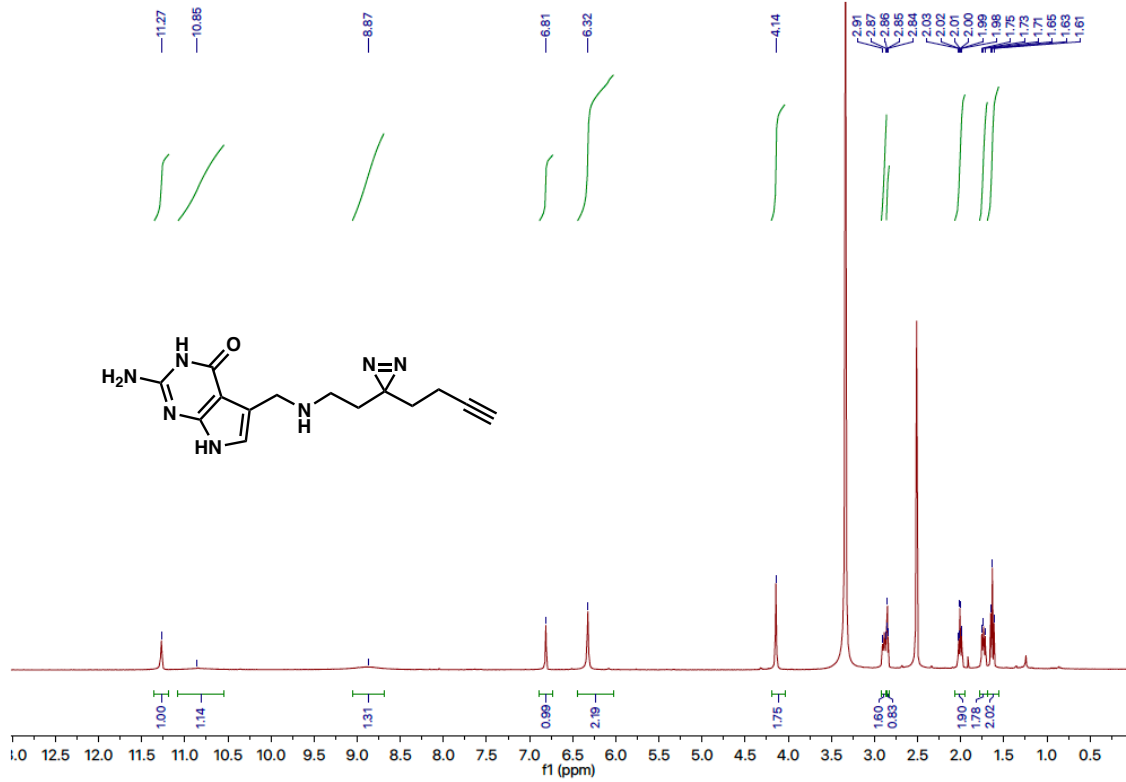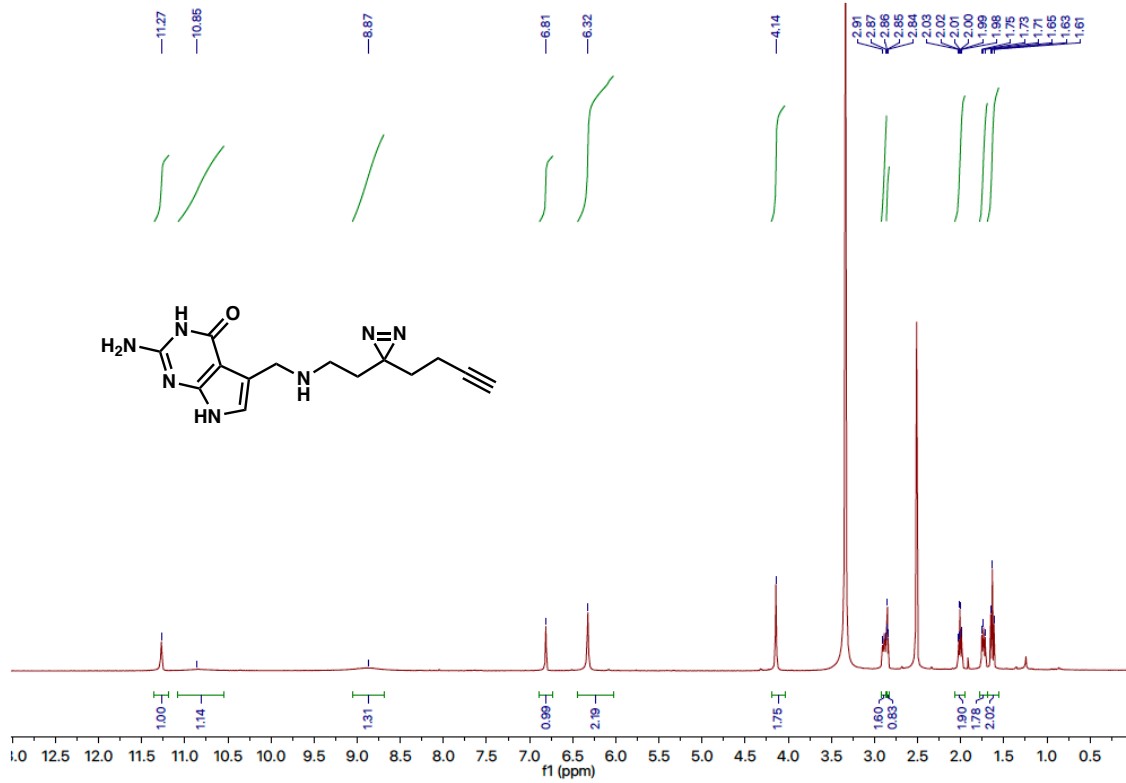

**Compound 12** (*N*-((2-amino-4-oxo-4,7-dihydro-3*H*-pyrrolo[2,3-*d*]pyrimidin-5-yl)methyl)-3-(3-methyl-3*H*-diazirin-3-yl)propanamide).

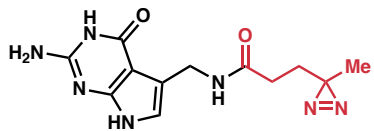

The 3-(3-methyl-3*H*-diazirin-3-yl)propanoic acid was prepared according to the literature protocol. Then, compound 20 was prepared according to the general procedure **B**. White solid (12.0 mg, 85% yield).  $^1\text{H}$  NMR (500 MHz, DMSO):  $\delta$  10.82, 10.32, 8.22 (t,  $J = 5.3$  Hz, 1H), 6.50 (s, 1H), 6.08 (s, 1H), 4.29 (d,  $J = 5.3$  Hz, 2H), 2.02-1.99 (m, 2H), 1.60-1.57 (m, 2H), 0.99 (s, 3H);  $^{13}\text{C}\{^1\text{H}\}$  NMR (126 MHz, DMSO): 170.5, 160.0, 152.72, 151.91, 115.84, 114.25, 98.82, 35.58, 30.34, 30.28, 26.30, 19.78; HRMS  $m/z$ : calcd. for  $\text{C}_{12}\text{H}_{16}\text{N}_7\text{O}_2$   $[\text{M}+\text{H}]^+$  290.1360, found 290.1352.

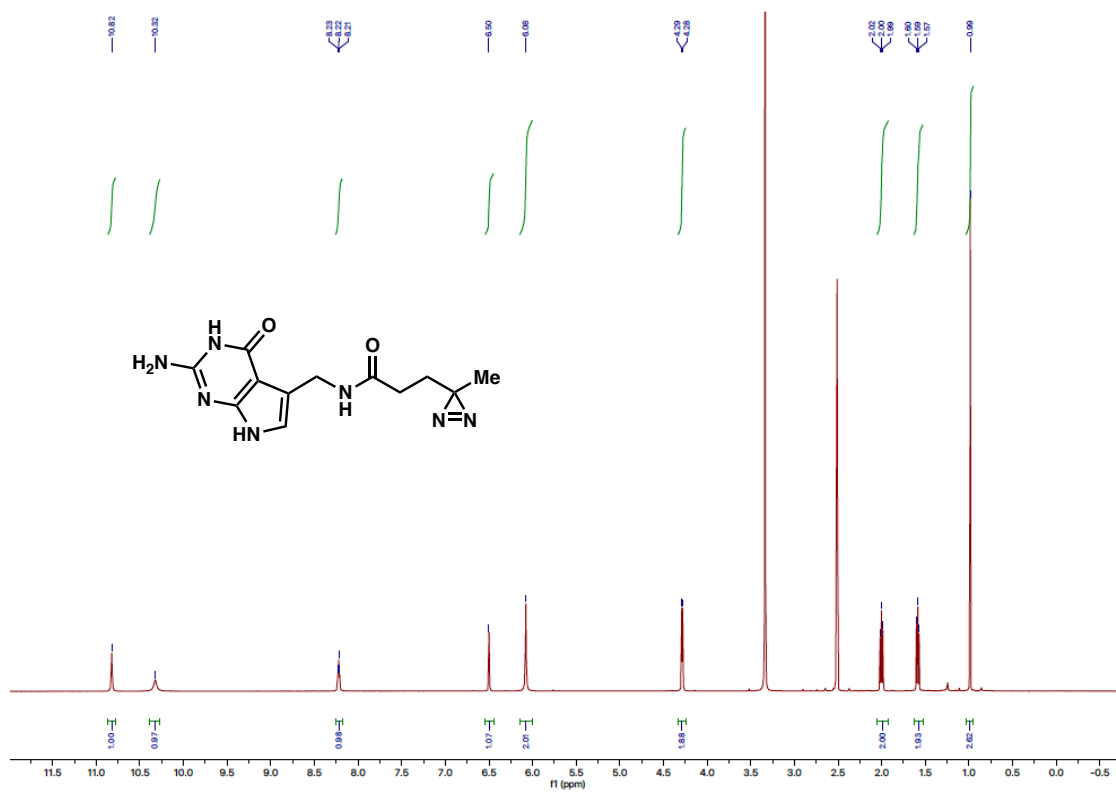

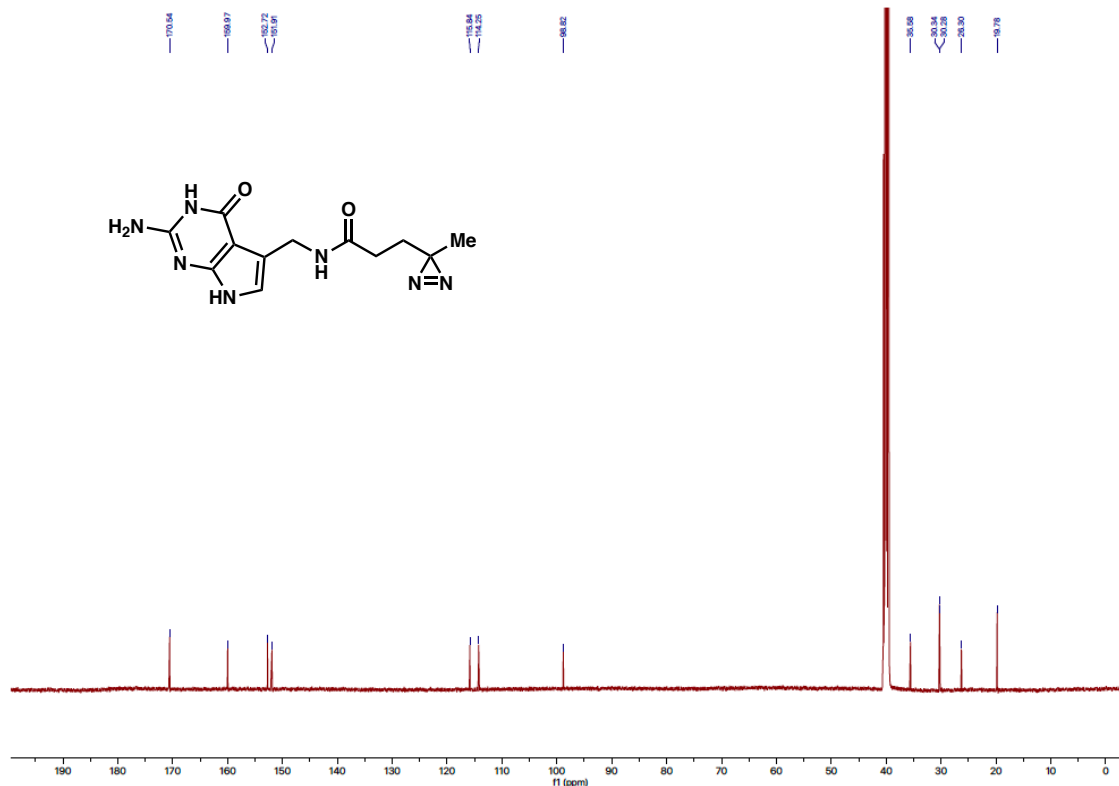

**Compound 13** (*N*-((2-amino-4-oxo-4,7-dihydro-3*H*-pyrrolo[2,3-*d*]pyrimidin-5-yl)methyl)-3-(3-(but-3-yn-1-yl)-3*H*-diazirin-3-yl)propanamide).

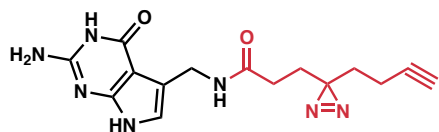

Prepared according to the general procedure **B** (Note that the reaction was performed in dark). White solid.

$^1\text{H}$  NMR (500 MHz, DMSO):  $\delta$  10.83 (s, 1H), 10.34 (s, 1H), 8.21 (t,  $J = 5.4$  Hz, 1H), 6.50 (s, 1H), 6.08 (s, 2H), 4.28 (d,  $J = 5.4$  Hz, 2H), 2.82 (t,  $J = 2.6$  Hz, 1H), 2.00 (ddd,  $J = 7.5, 4.8, 2.6$  Hz, 2H), 1.97-1.92 (m, 2H), 1.68-1.65 (m, 2H), 1.57 (t,  $J = 7.4$  Hz, 2H).  $^{13}\text{C}\{^1\text{H}\}$  NMR (126 MHz, DMSO): 170.5, 160.0, 152.7, 151.9, 115.8, 114.3, 98.8, 83.7, 72.2, 35.6, 31.9, 30.1, 28.8, 28.6, 13.1; HRMS  $m/z$ : calcd. for  $\text{C}_{15}\text{H}_{18}\text{N}_7\text{O}_2$   $[\text{M}+\text{H}]^+$  328.1516, found 328.1511.



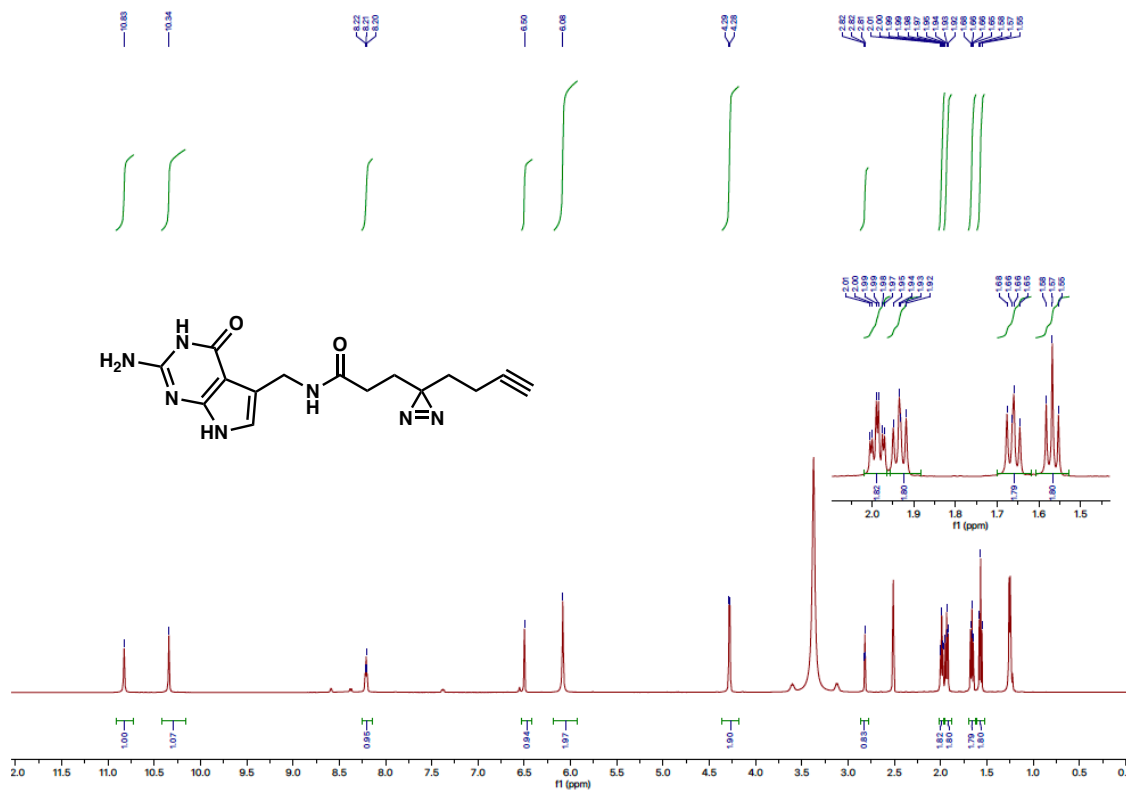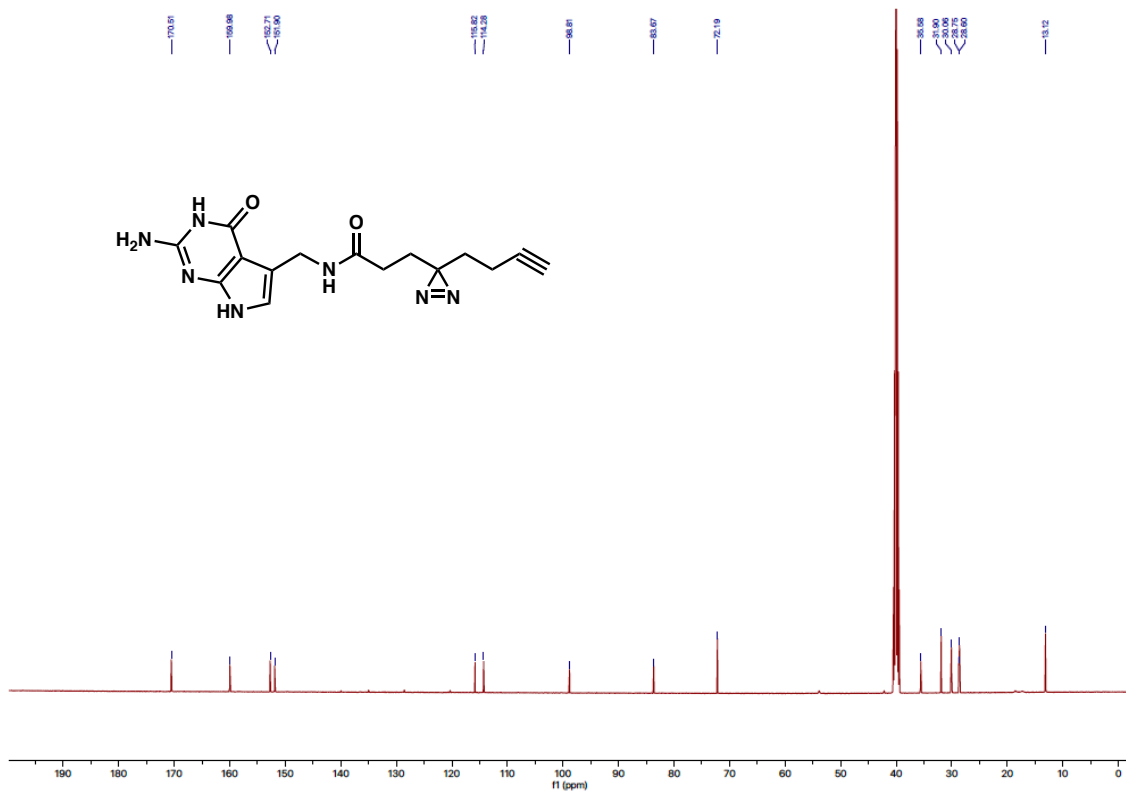

**Compound 14** (2-amino-5-(((4-(3-(trifluoromethyl)-3*H*-diazirin-3-yl)benzyl)amino)methyl)-3,7-dihydro-4*H*-pyrrolo[2,3-*d*]pyrimidin-4-one).

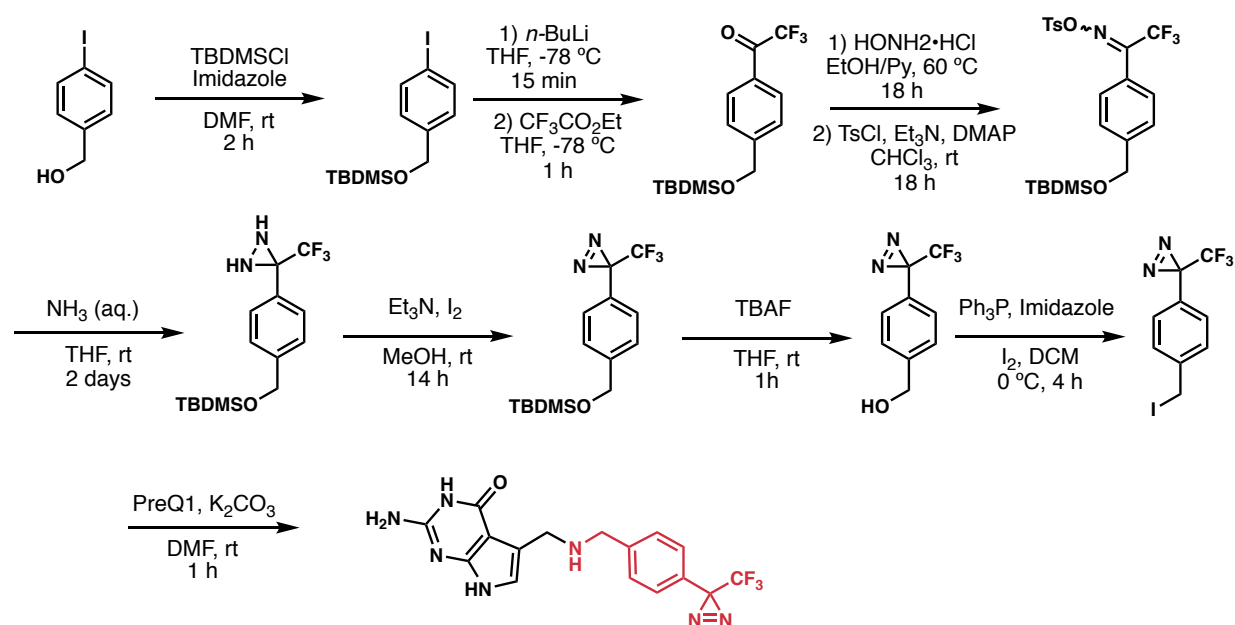

The 3-(4-(iodomethyl)phenyl)-3-(trifluoromethyl)-3*H*-diazirine was prepared according to the literature procedure. Then, compound **15** was prepared according the procedure for compound **14**. White solid.  $^1\text{H}$  NMR (500 MHz, DMSO):  $\delta$  11.28 (s, 1H), 10.86 (s, 1H), 9.37 (s, 1H), 7.61 (d,  $J = 8.5$  Hz, 2H), 7.37 (d,  $J = 8.1$  Hz, 2H), 6.84 (d,  $J = 2.2$  Hz, 1H), 6.35 (s, 2H), 4.23 (s, 2H), 4.16 (s, 2H);  $^{13}\text{C}\{^1\text{H}\}$  NMR (126 MHz, DMSO):  $\delta$  160.9, 153.1, 152.8, 131.1, 128.4, 127.3, 123.4 (q,  $J = 276$  Hz), 117.7, 98.7, 49.3, 43.6, 40.9, 28.3 (q,  $J = 40.0$  Hz);  $^{19}\text{F}$  NMR (471 MHz, DMSO)  $\delta$  -64.6; HRMS  $m/z$ : calcd. for  $\text{C}_{16}\text{H}_{15}\text{F}_3\text{N}_7\text{O}$   $[\text{M}+\text{H}]^+$  378.1285, found 378.1271.

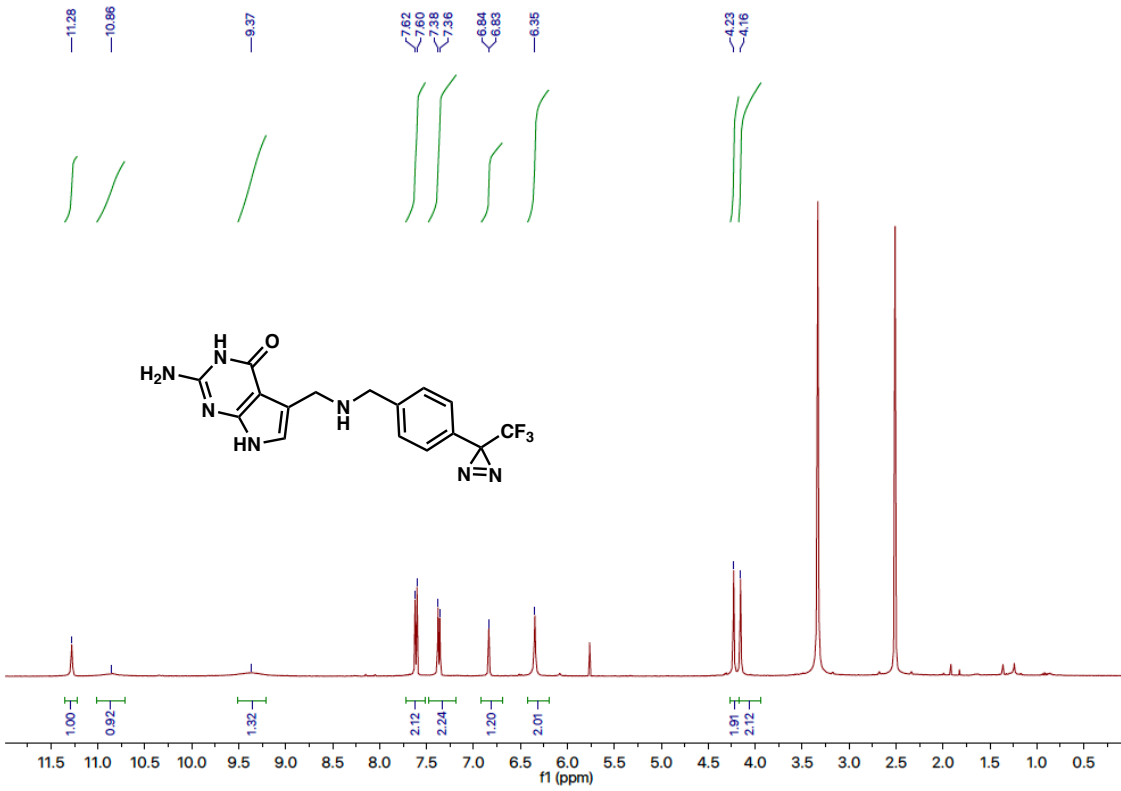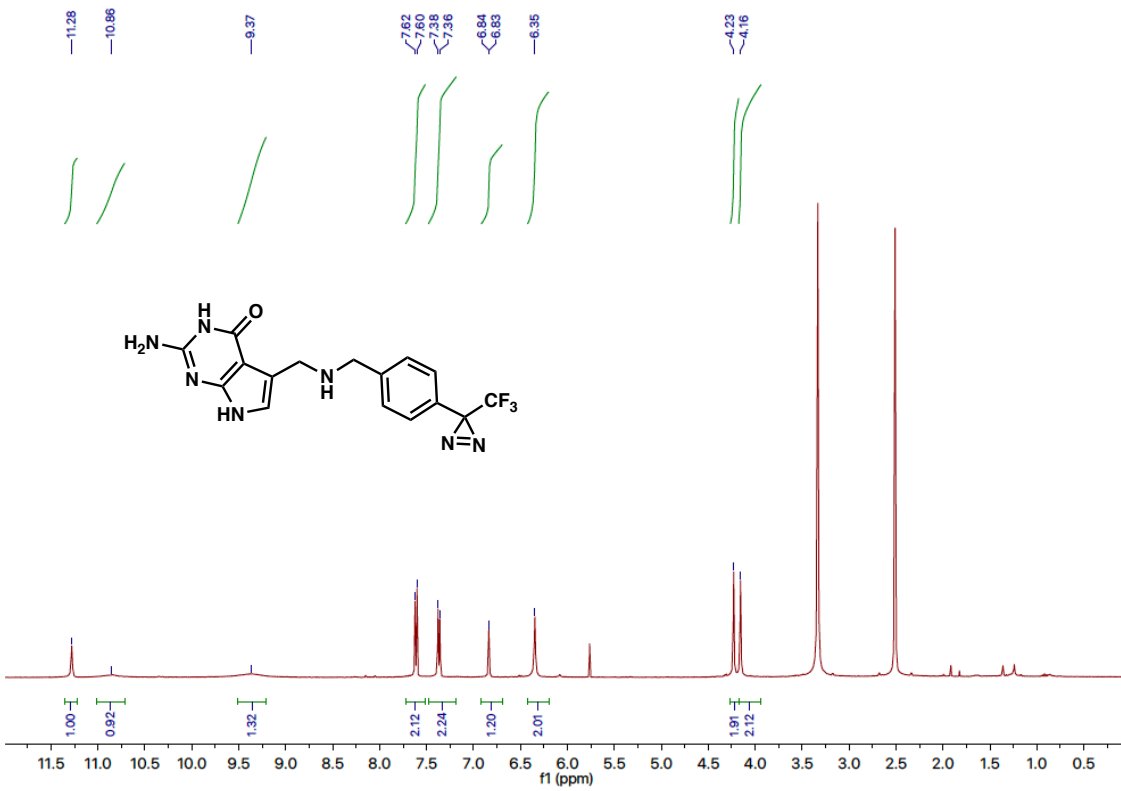

**Compound 15** (2-amino-5-(12-(4-(3-(trifluoromethyl)-3*H*-diazirin-3-yl)phenyl)-5,8-dioxo-2,11-diazadodecyl)-3,7-dihydro-4*H*-pyrrolo[2,3-*d*]pyrimidin-4-one).

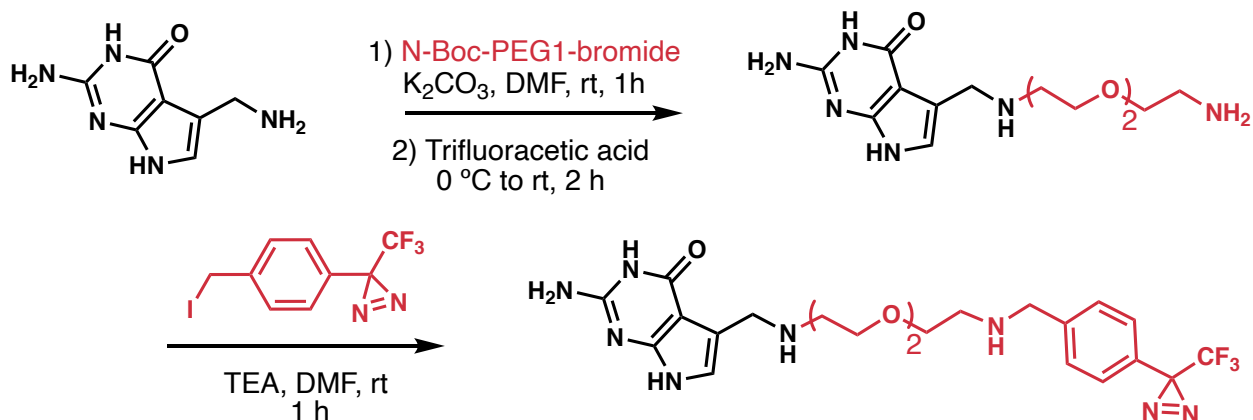

White solid. <sup>1</sup>H NMR (500 MHz, DMSO): δ 11.44 (s, 1H), 11.14 (s, 1H), 10.47 (s, 1H), 7.81 (brs, 3H), 7.64 (d, *J* = 8.1 Hz, 2H), 7.37 (d, *J* = 8.1 Hz, 2H), 6.92 (s, 1H), 6.54 (s, 2H), 4.58-4.31(m, 4H), 3.73 (m, 2H), 3.57-3.46 (m, 6H), 3.34-3.18 (m, 2H), 3.00-2.90 (m, 2H); <sup>13</sup>C{<sup>1</sup>H} NMR (126 MHz, DMSO): 161.2, 158.6 (q, *J* = 34.6 Hz), 153.3, 153.0, 132.9, 132.5, 129.2, 127.3, 119.4, 116.7 (q, *J* = 293.6 Hz), 107.3, 98.6, 69.9, 69.8, 67.1, 64.8, 56.2, 51.9, 51.1, 39.0; HRMS *m/z*: calcd. for C<sub>22</sub>H<sub>28</sub>F<sub>3</sub>N<sub>8</sub>O<sub>3</sub> [M+H]<sup>+</sup> 509.2231; found 509.2224.

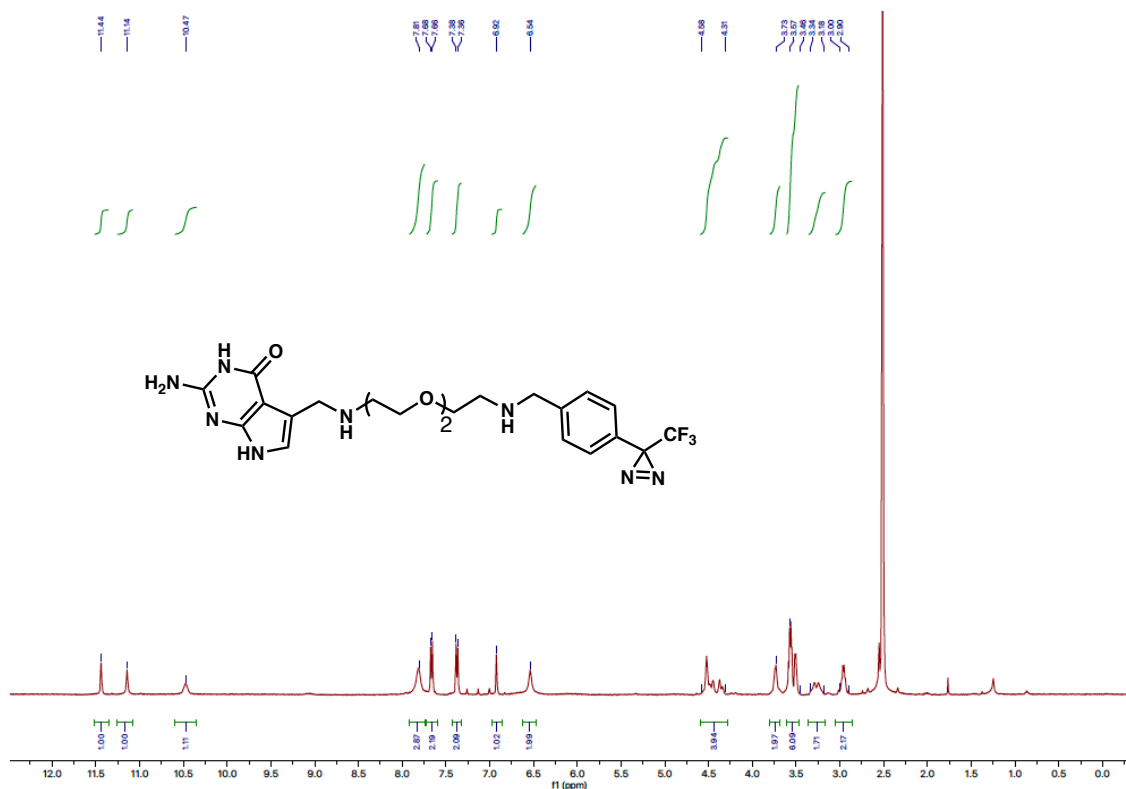

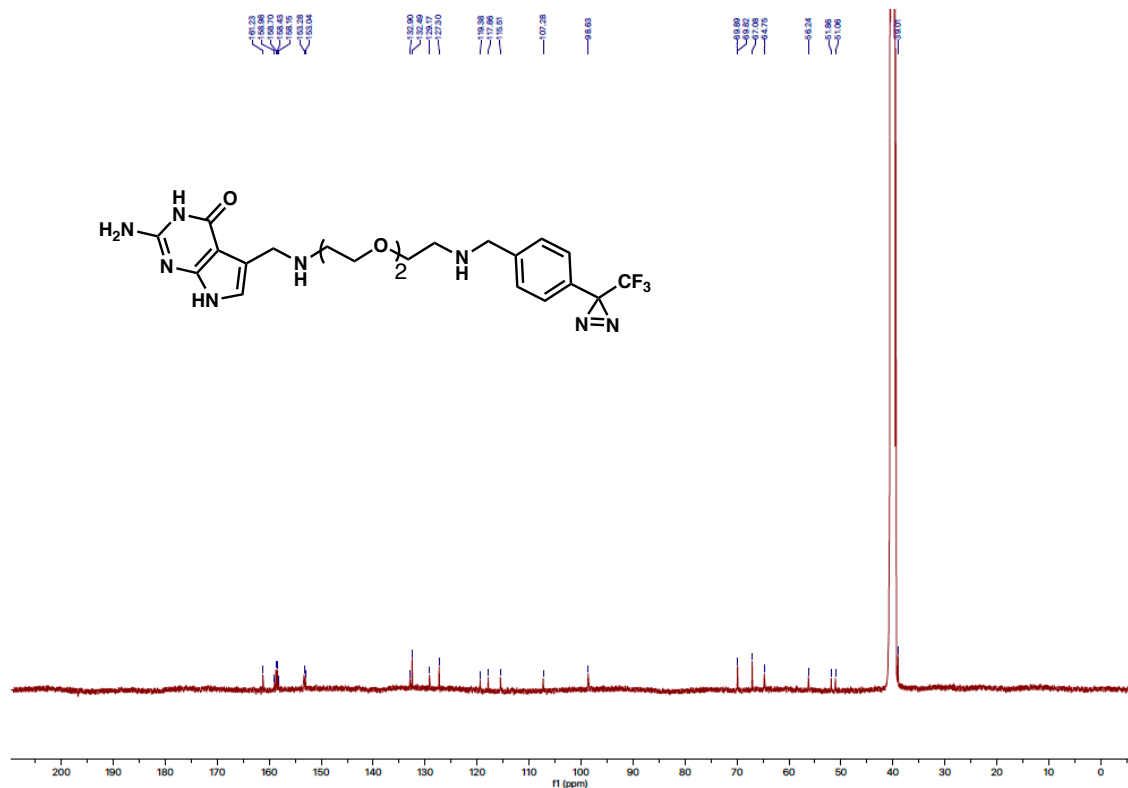

**Compound 16** (2-amino-5-(15-(4-(3-(trifluoromethyl)-3*H*-diazirin-3-yl)phenyl)-5,8,11-trioxa-2,14-diazapentadecyl)-3,7-dihydro-4*H*-pyrrolo[2,3-*d*]pyrimidin-4-one).

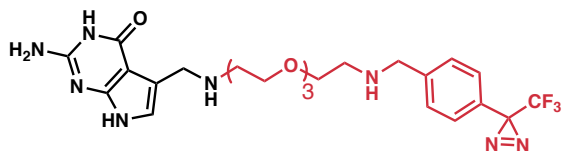

Prepared according to the procedure for compound **15**. White solid.  $^1\text{H}$  NMR (500 MHz, DMSO):  $\delta$  11.43 (s, 1H), 11.11 (s, 1H), 10.48 (s, 1H) 7.78 (brs, 3H), 7.67 (d,  $J = 8.1$  Hz, 2H), 7.37

(d,  $J = 8.1$  Hz, 2H), 6.92 (s, 1H), 6.49 (s, 2H), 4.57-4.17 (m, 4H), 3.72 (m, 2H), 3.59-3.45 (m, 10H), 3.34-3.18 (m, 2H), 3.00-2.91 (m, 2H);  $^{13}\text{C}\{^1\text{H}\}$  NMR (126 MHz, DMSO): 161.2, 158.6 (q,  $J = 36.0$  Hz), 153.3, 153.0, 132.9, 132.5, 129.2, 127.3, 121.1, 119.4, 116.4 (q,  $J = 293.0$  Hz), 107.3, 98.7, 70.0, 69.9, 67.2, 64.8, 56.3, 51.8, 51.1, 39.0; HRMS  $m/z$ : calcd. for  $\text{C}_{24}\text{H}_{32}\text{F}_3\text{N}_8\text{O}_4$   $[\text{M}+\text{H}]^+$  553.2493; found 553.2484.

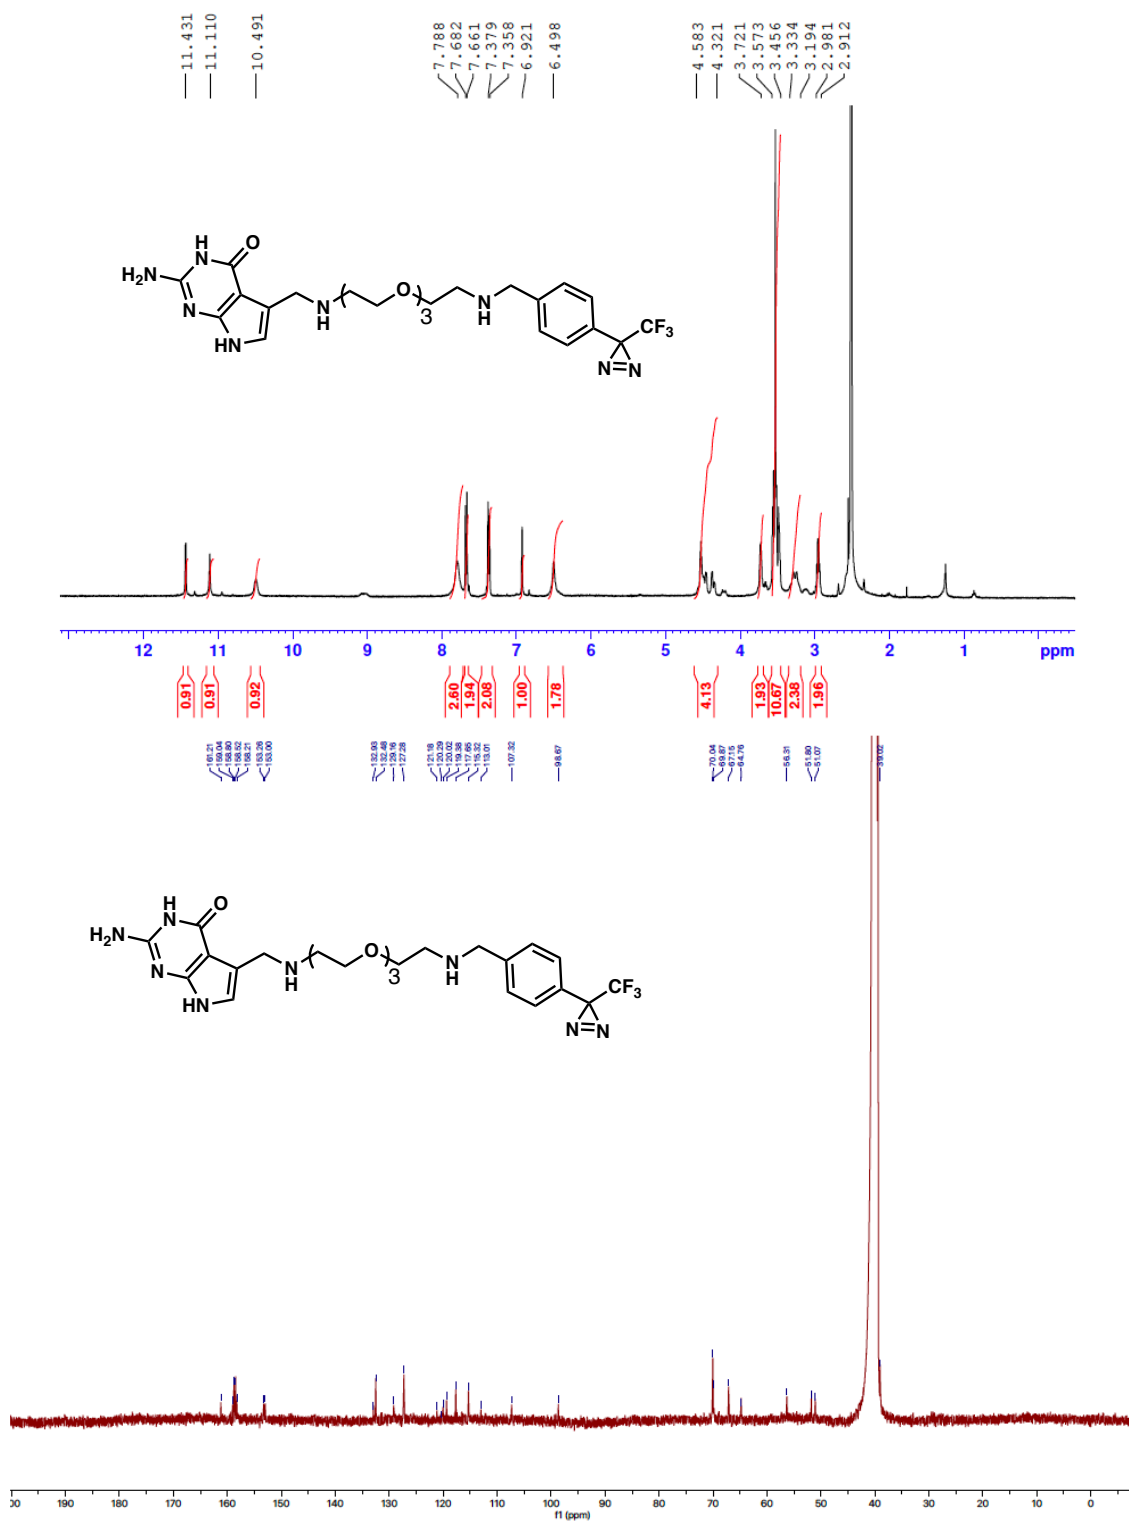

**Compound 17** (*N*-((2-amino-4-oxo-4,7-dihydro-3*H*-pyrrolo[2,3-*d*]pyrimidin-5-yl)methyl)-3-(2-(2-((4-(3-(trifluoromethyl)-3*H*-diazirin-3-yl)benzyl)amino)ethoxy)ethoxy)propanamide).

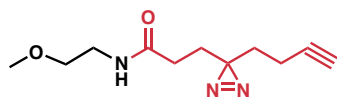

This compound was synthesized using the general procedure **B** for the coupling reaction. White solid.  $^1\text{H}$  NMR (500 MHz, DMSO):  $\delta$  7.94 (s, 1H), 3.31 (d,  $J = 5.8$  Hz, 2H), 3.23 (s, 3H), 3.21-3.14 (m, 2H), 2.82 (t,  $J = 2.7$  Hz, 1H), 1.98 (td,  $J = 7.4$ , 2H), 1.94-1.86 (m, 2H), 1.62 (t, 2H), 1.56 (t,  $J = 7.4$  Hz, 2H);  $^{13}\text{C}\{^1\text{H}\}$  NMR (126 MHz, DMSO):  $\delta$  170.72, 83.18, 71.74, 70.62, 57.88, 38.36, 31.40, 29.37, 28.15, 12.65; HRMS  $m/z$  calculated for  $\text{C}_{10}\text{H}_{17}\text{N}_3\text{O}$   $[\text{M}+\text{H}]^+$  196.2619, found 196.2599.

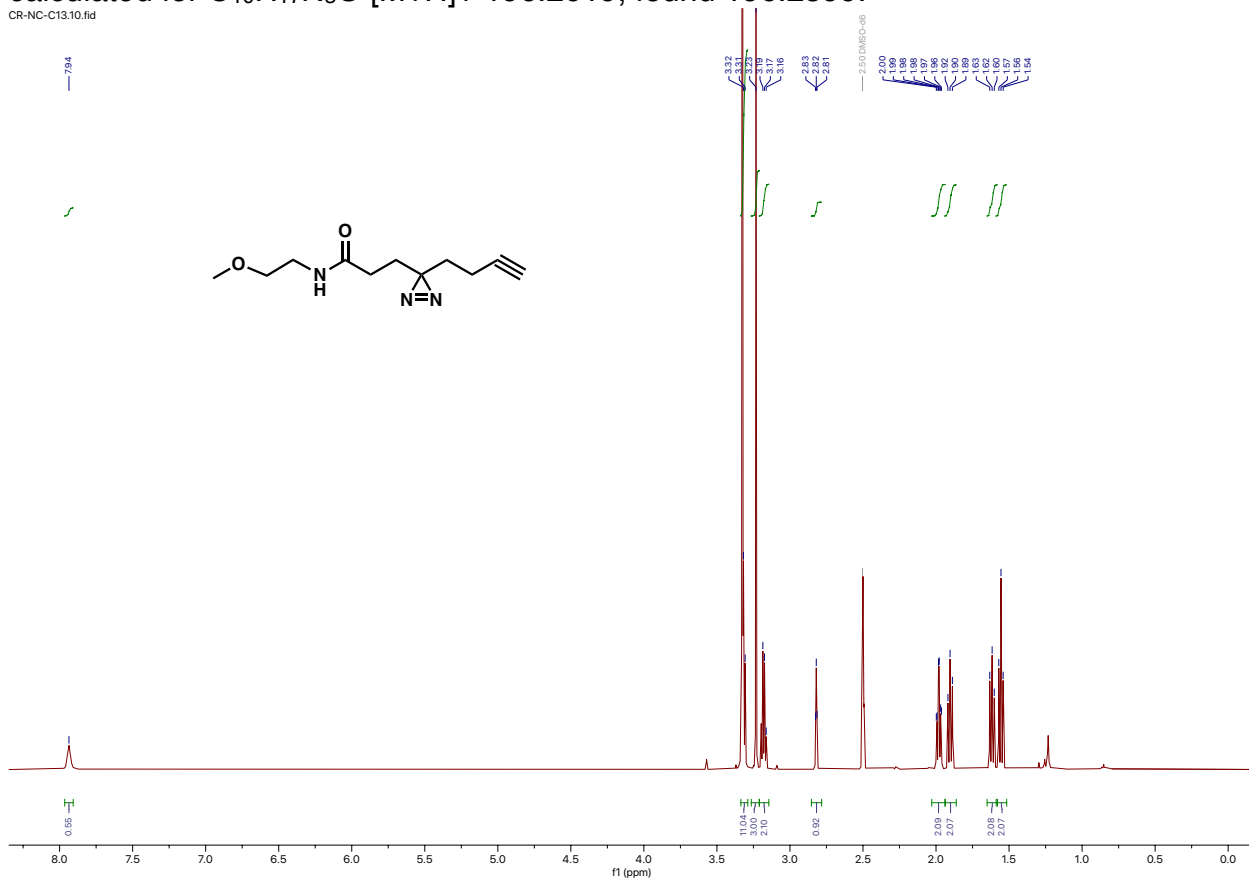

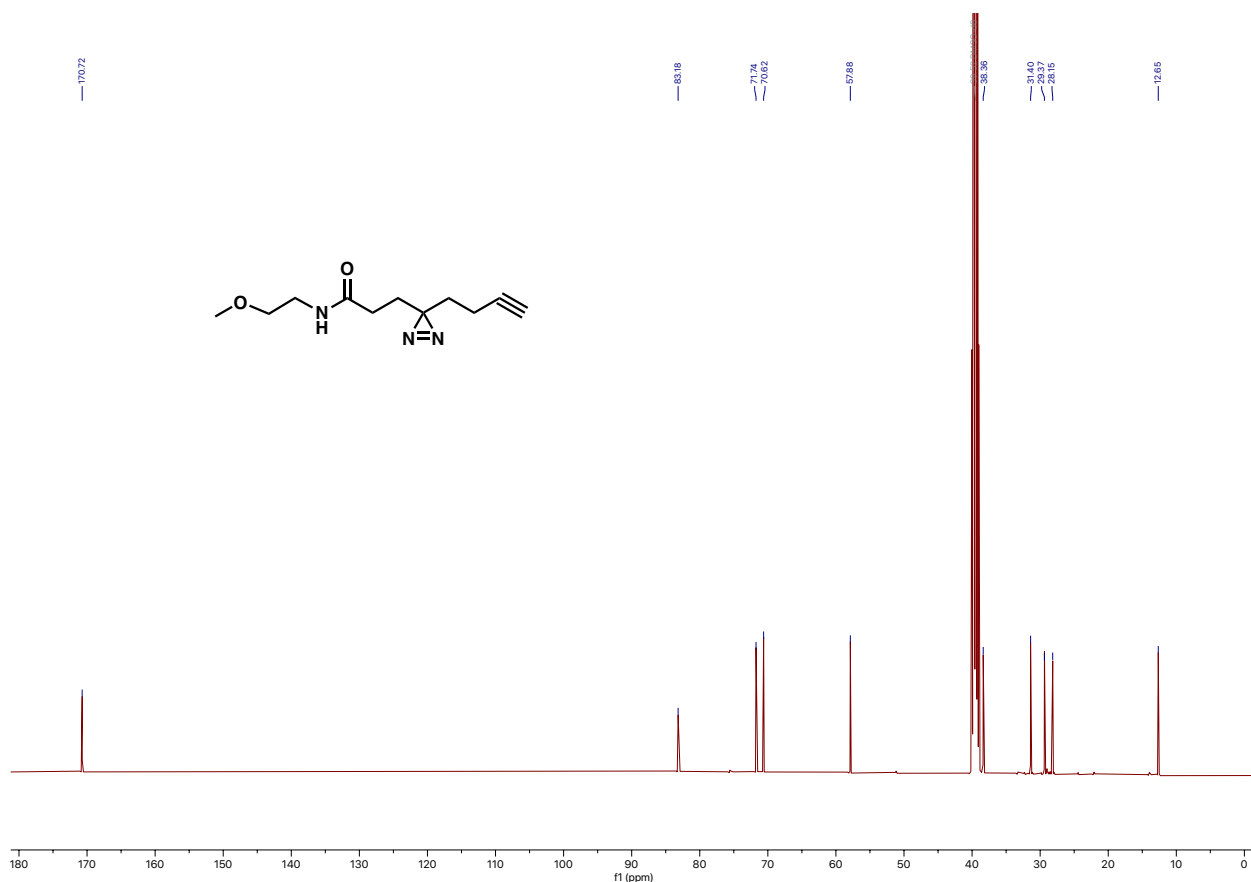

**Compound Bio-11.** (*N*-(2-(2-(2-(4-(2-(3-(2-(((2-amino-4-oxo-4,7-dihydro-3*H*-pyrrolo[2,3-*d*]pyrimidin-5-yl)methyl)amino)ethyl)-3*H*-diazirin-3-yl)ethyl)-1*H*-1,2,3-triazol-1-yl)ethoxy)ethoxy)ethyl)-5-((3*aR*,4*R*,6*aS*)-2-oxohexahydro-1*H*-thieno[3,4-*d*]imidazol-4-yl)pentanamide).

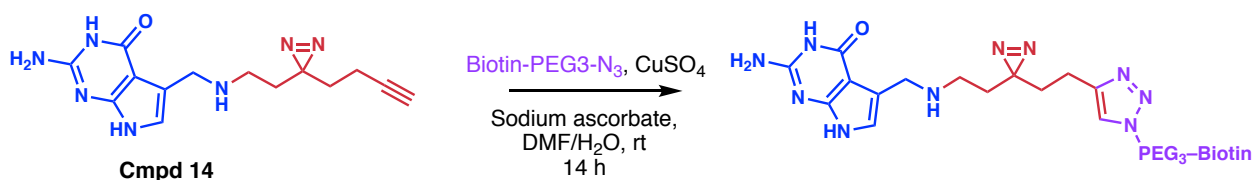

To a solution of compound **14** (30.0 mg, 100  $\mu$ mol, 1.0 equiv.) and Biotin-PEG-N<sub>3</sub> (45 mg, 100  $\mu$ mol, 1.0 equiv.) in anhydrous DMF (2.0 mL), sodium ascorbate (100  $\mu$ l of 0.2 M, 20  $\mu$ mol, 0.2 equiv.) and CuSO<sub>4</sub> (100  $\mu$ L of 0.2M, 20  $\mu$ mol, 0.2 equiv.) and the reaction mixture was stirred at room temperature for 14 hr under N<sub>2</sub> atmosphere. Then, the reaction mixture was concentrated under reduced pressure and purified by preparative HPLC eluting with H<sub>2</sub>O:MeCN containing 0.1% TFA to obtain the titled compound as white solid (40.0 mg, 54% yield). <sup>1</sup>H NMR (500 MHz, DMSO):  $\delta$  11.34 (s, 1H), 11.0 (s, 1H), 9.04 (s, 2H), 7.85-7.82 (m, 2H), 6.82 (s, 1H), 6.44 (brs, 3H), 4.48 (t, *J* = 5.2 Hz, 2H), 4.32 (dd, *J* = 7.6, 4.8 Hz, 1H), 4.18-4.12 (m, 3H), 3.79 (t, *J* = 5.2 Hz, 2H), 3.52-3.47 (m, 8H), 3.38 (t, *J* = 6.0 Hz, 2H), 3.18 (q, *J* = 6.0 Hz, 2H), 3.12-3.07



(m, 1H), 2.93-2.86 (m, 2H), 2.82 (dd,  $J = 12.4, 5.0$  Hz, 1H), 2.59 (d,  $J = 12.4$  Hz, 1H), 2.44-2.40 (m, 2H), 2.06 (t,  $J = 7.4$  Hz, 2H), 1.82-1.24 (m, 10H);  $^{13}\text{C}\{^1\text{H}\}$  NMR (126 MHz, DMSO): 172.7, 163.3, 160.7, 153.2, 152.1, 118.0, 108.7, 98.7, 70.2, 70.1, 70.02, 70.00, 69.6, 69.2, 61.5, 59.7, 55.9, 49.8, 43.3, 41.3, 38.9, 35.6, 31.6, 29.9, 28.6, 28.5, 27.1, 25.7, 20.0; HRMS  $m/z$ : calcd. for  $\text{C}_{32}\text{H}_{50}\text{N}_{13}\text{O}_6\text{S}$   $[\text{M}+\text{H}]^+$  744.3722, found 744.3716.

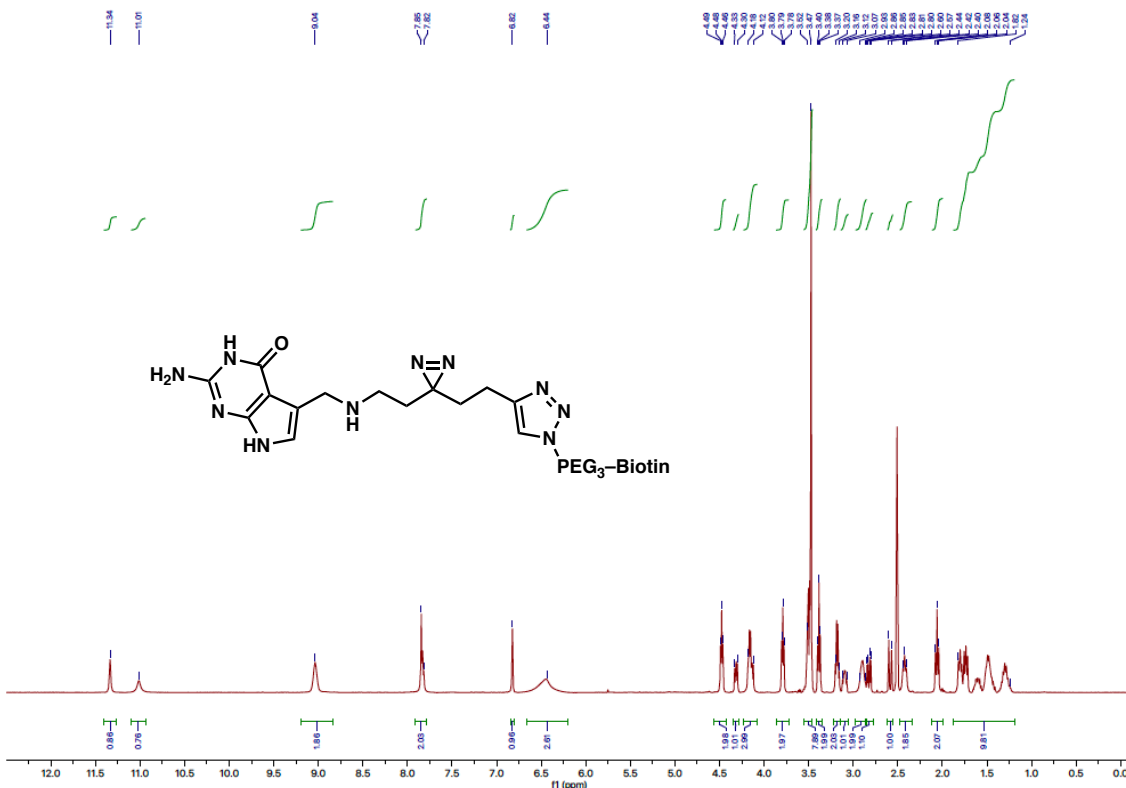

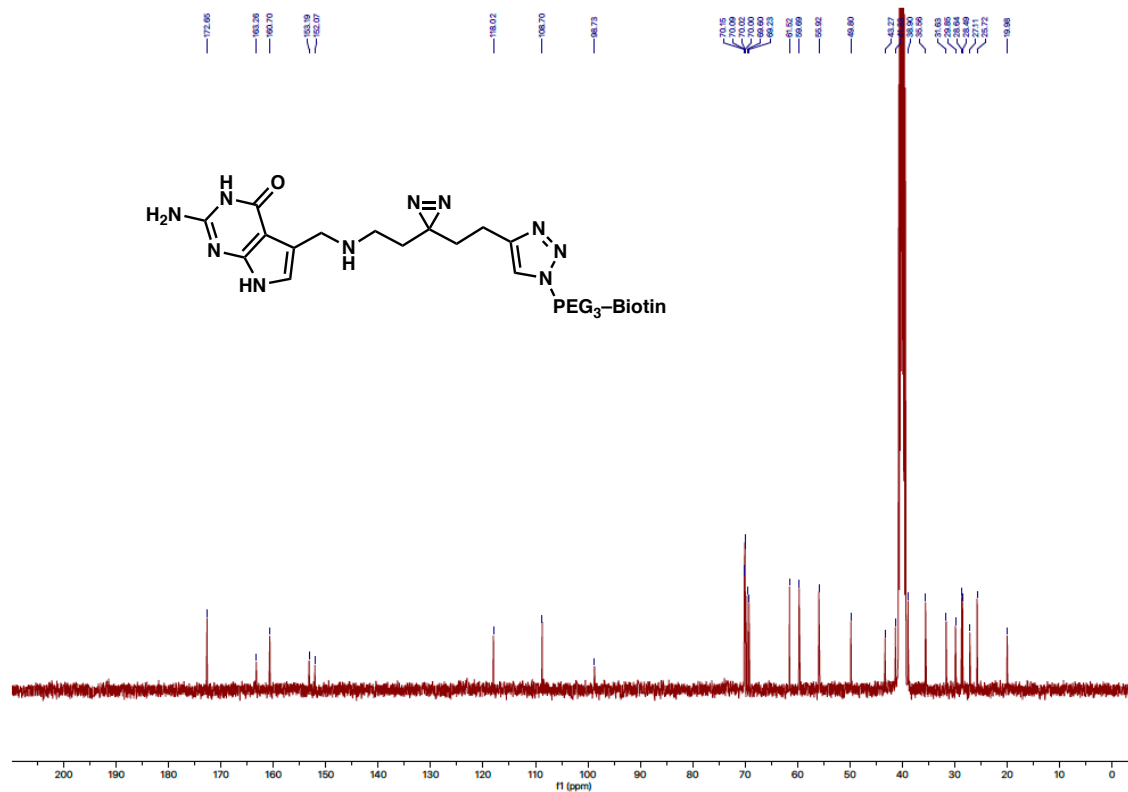

## References:

1. Weiss, M. S. Global indicators of X-ray data quality. *J Appl Crystallogr* **34**, 130-135 (2001).
2. Karplus, P. A. & Diederichs, K. Linking crystallographic model and data quality. *Science* **336**, 1030-1033 (2012).
